# Supplementary material for: Identification of natural killer cell-related characteristics to predict the clinical prognosis and immune microenvironment of patients with low-grade glioma
Source: publisher site journal article supplement (doi:10.18632/aging.204850), 2023-07-05
Supplement: Supplementary file [file aging-v15i13-204850-supplementary-material-SD1.pdf]

# SUPPLEMENTARY FIGURES

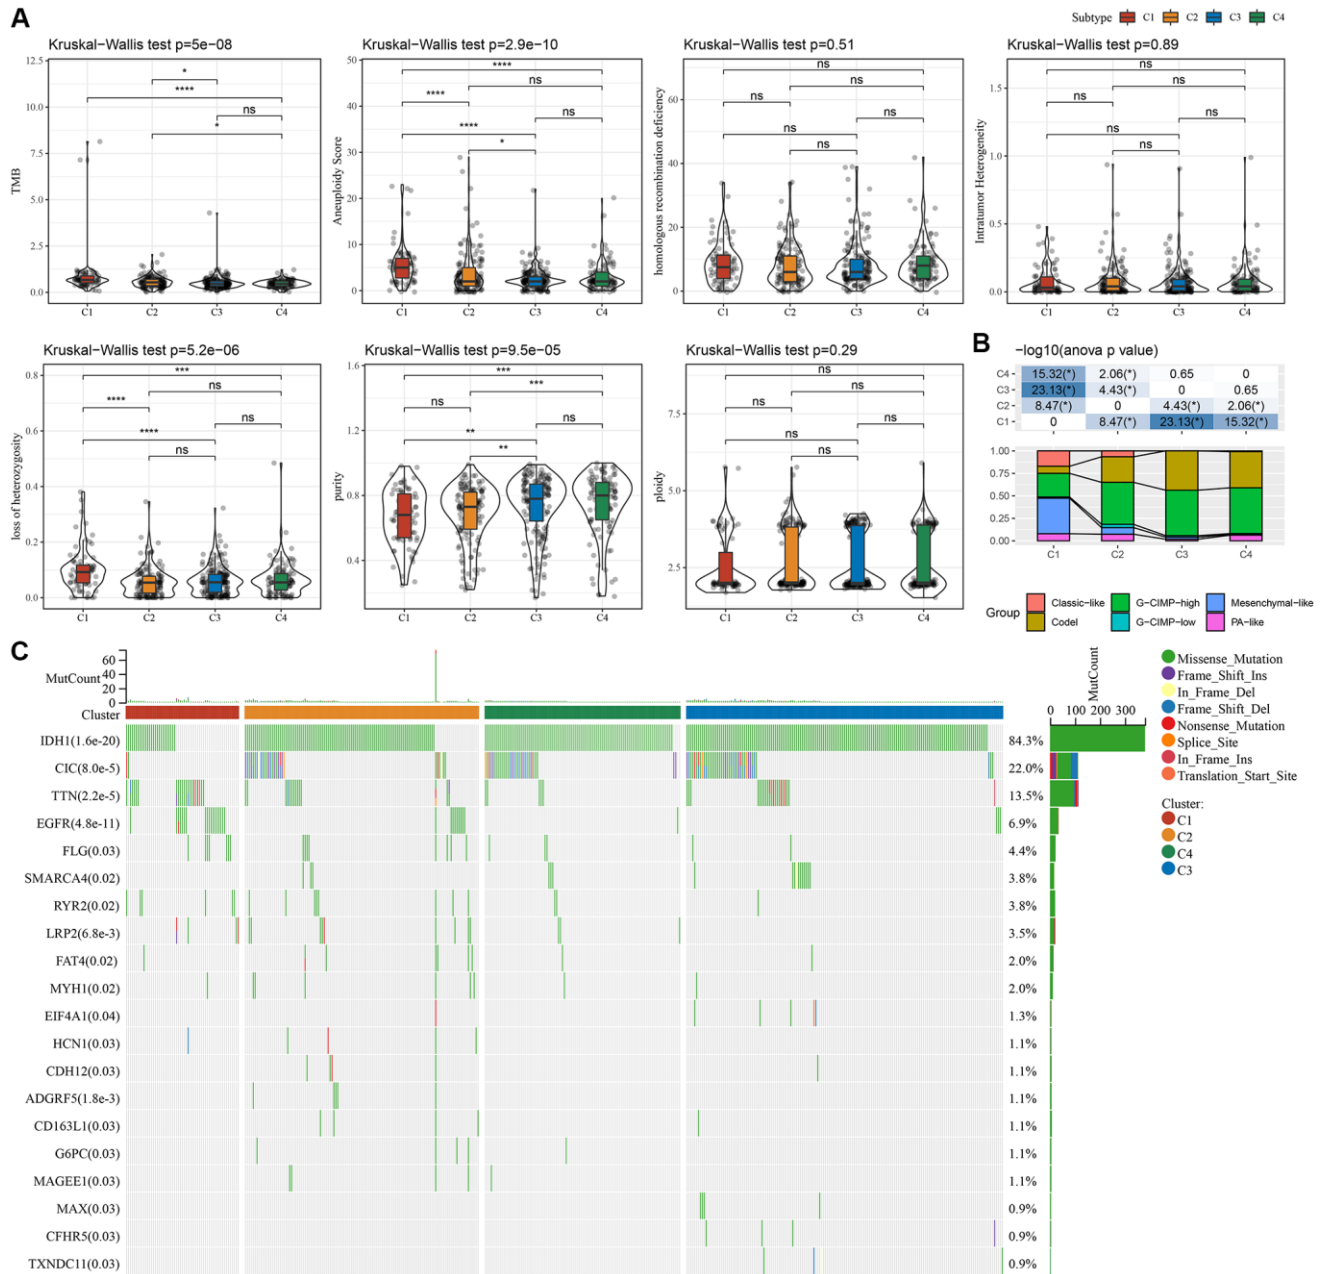

**Supplementary Figure 1. Mutation burden in different molecular subtypes.** (A) Comparison of TMB, aneuploidy score, homologous recombination defects, intratumor heterogeneity, LOH, purity, and ploidy among different molecular subtypes in the TCGA-LGG cohort. (B) Comparison of the four molecular subtypes with immune molecular subtypes. (C) Somatic mutations in the four molecular subtypes (chi-square test). \* $P < 0.05$ . \*\* $P < 0.01$ ; \*\*\* $P < 0.001$ ; \*\*\*\* $P < 0.0001$ . Abbreviations: ns: no significance: ANOVA; analysis of variance; IDH: isocitrate dehydrogenase; WT: wild-type; Mut: mutant; MGMT: O-6-methylguanine-DNA methyltransferase; TMB: tumor mutation burden; LOH: loss of heterozygosity; TCGA: The Cancer Genome Atlas; LGG: low-grade glioma.

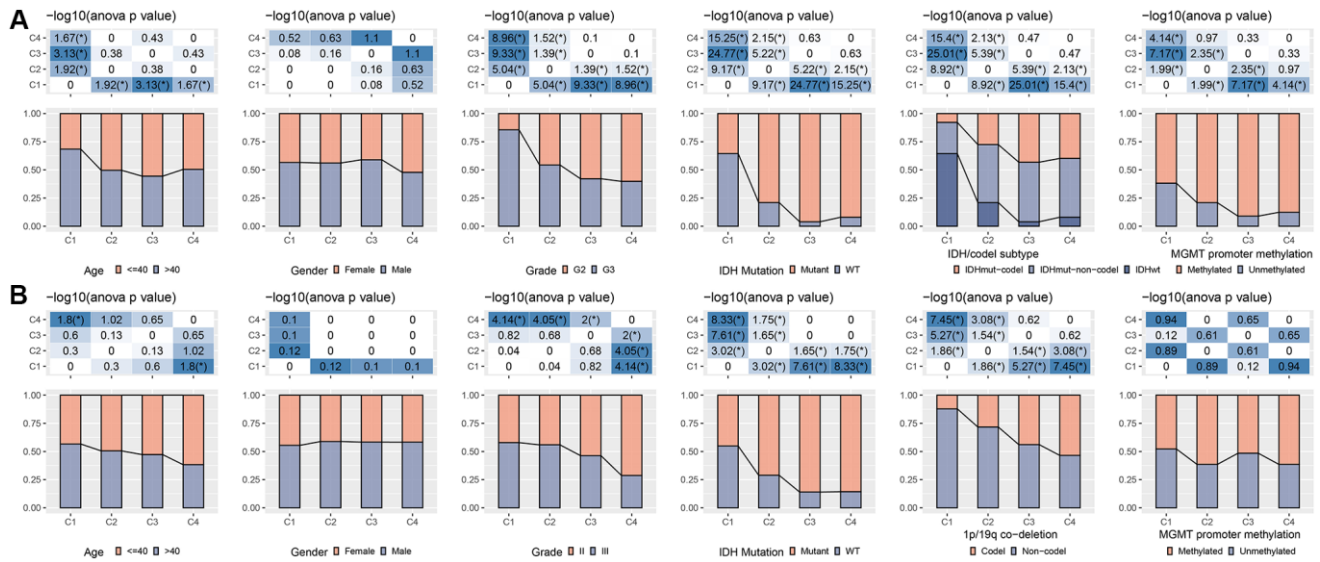

**Supplementary Figure 2. Distribution patterns of various molecular subtypes in each clinical variable. (A)** Clinicopathological characteristics of molecular subtypes in the TCGA-LGG cohort. **(B)** Clinicopathological characteristics of molecular subtypes in the CGGA cohort; the upper part is the statistical significance of the pairwise distribution difference, the lower part is the proportion. Abbreviations: TMB: tumor mutation burden; ANOVA: analysis of variance; TCGA: The Cancer Genome Atlas; LGG: low-grade glioma; CGGA: Chinese Glioma Genome Atlas.

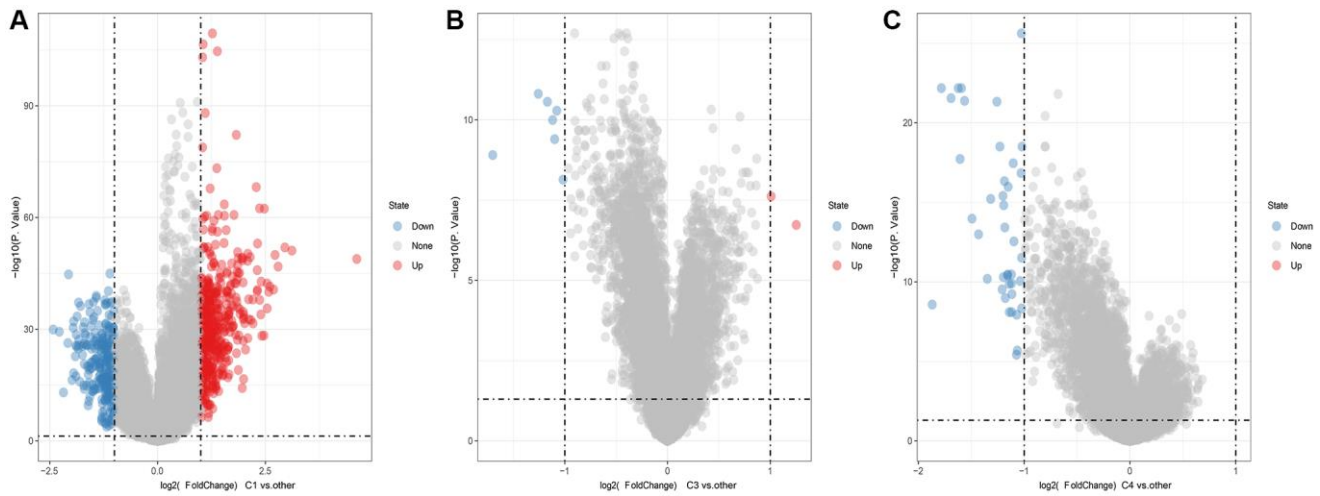

**Supplementary Figure 3. Identification of DEGs among different clusters. (A)** C1 vs. other. **(B)** C3 vs. other. **(C)** C4 vs. other. Abbreviation: DEGs: Differentially expressed genes.

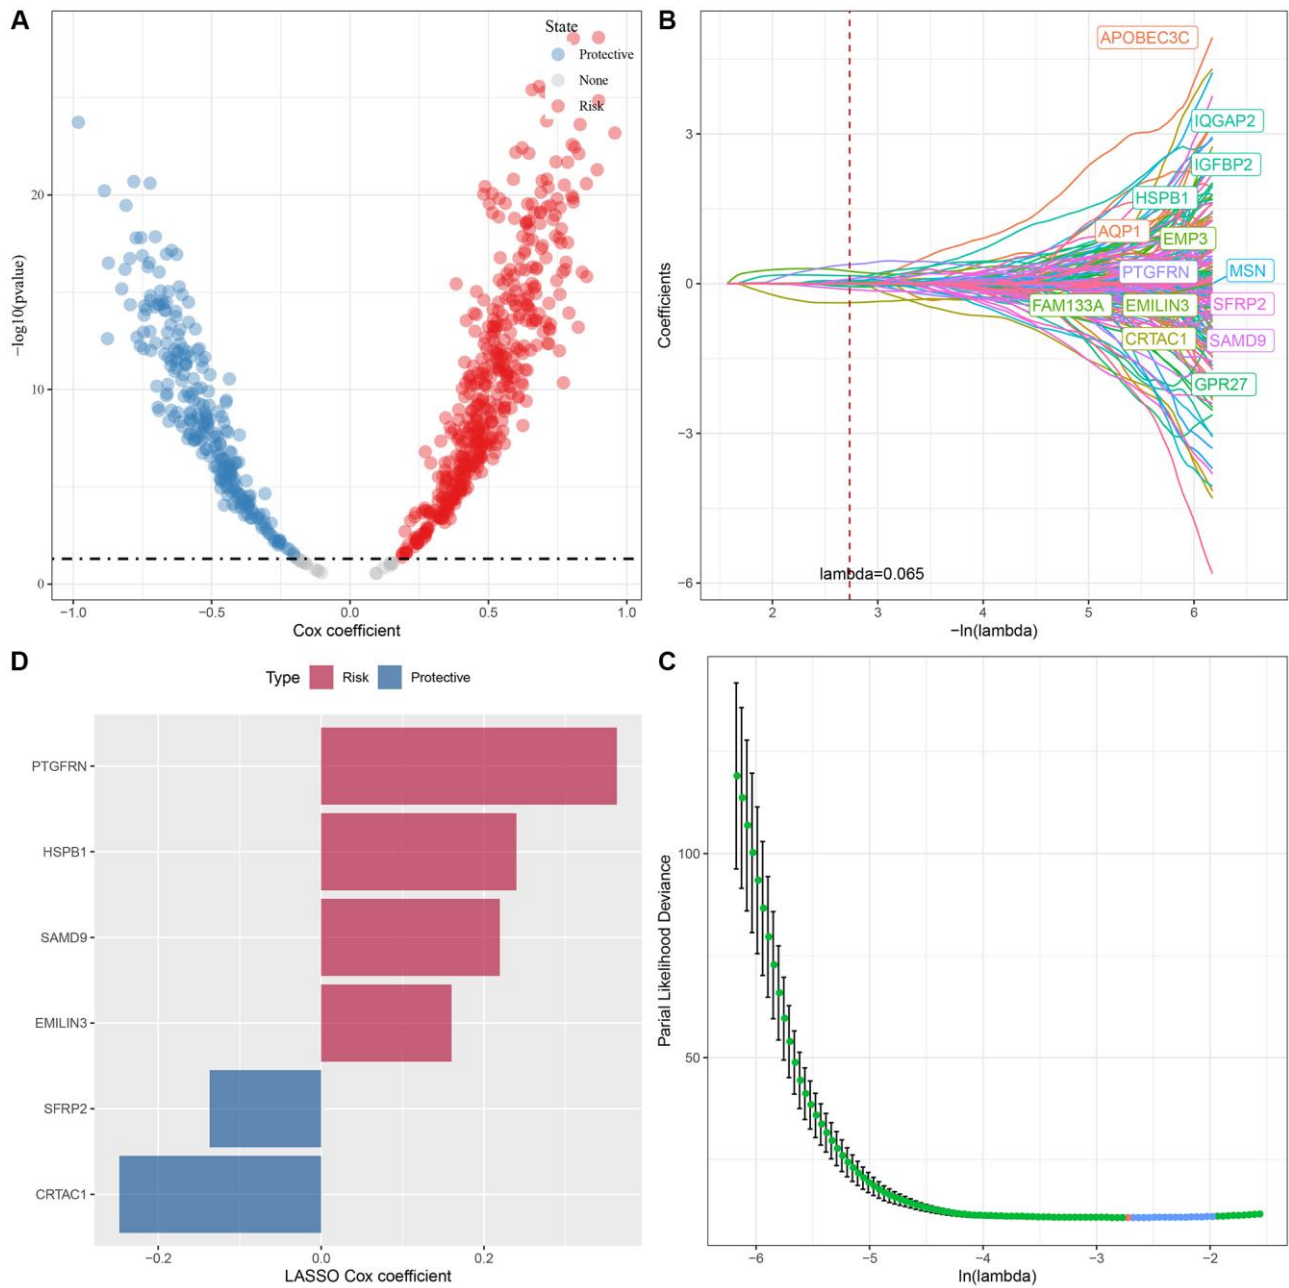

**Supplementary Figure 4. Construction of a prognostic model with key genes screened by LASSO algorithm. (A)** A total of 719 promising candidates were filtered from all the DEGs. **(B)** Changed trajectory of each independent variable with lambda. **(C)** Confidence interval under lambda. **(D)** Distribution of LASSO-Cox coefficients of the NK cell-associated prognostic gene signature. Abbreviations: LASSO: least absolute shrinkage and selection operator; DEGs: differentially expressed genes; NK: natural killer.

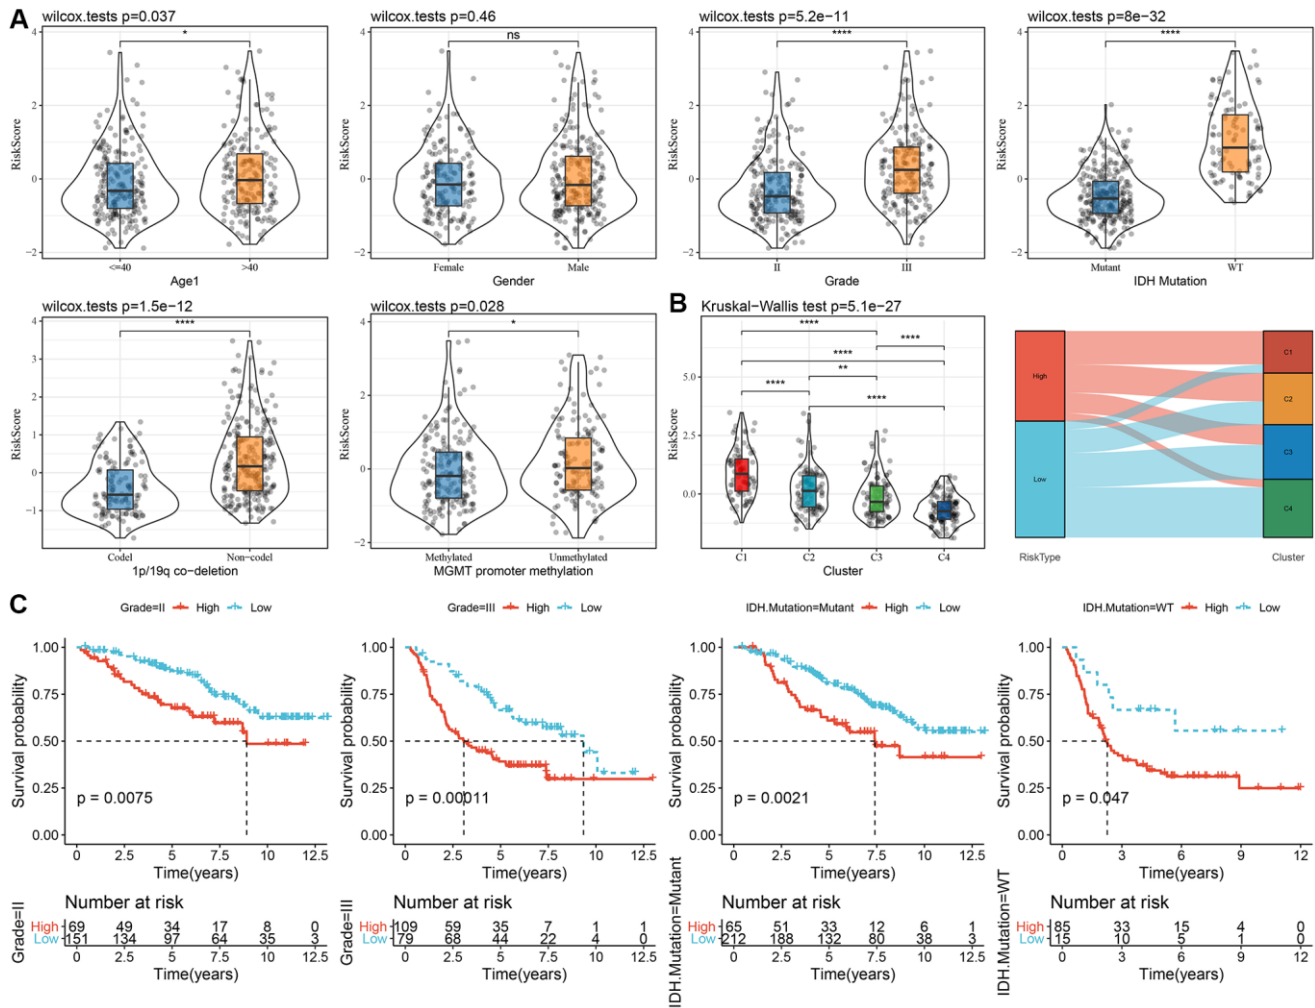

**Supplementary Figure 5. Association of RiskScore with clinical information in CGGA dataset.** (A) Differences in RiskScore among different clinicopathological groups in the CGGA-LGG cohort. (B) Differences in RiskScore among different molecular subtypes in the CGGA-LGG cohort. (C) KM curves between high and low RiskScore groups in different clinical subgroup. Abbreviations: CGGA: Chinese Glioma Genome Atlas; LGG: low-grade glioma; K-M: Kaplan-Meier.
