# Supplementary material for: Identification of natural killer cell-related characteristics to predict the clinical prognosis and immune microenvironment of patients with low-grade glioma
Source: Aging (Albany NY). 2023 Jul 5;15(13):6264–91. doi: 10.18632/aging.204850 (PMC10373982; doi:10.18632/aging.204850)
Supplement: Supplementary Tables 2-5 [file aging-15-204850-s003.xlsx]

## Sheet: Supplementary Table 2
Supplementary Table 2. Identification of 79 genes associated with NK cells.
APOBEC3G
APOL6
CCL4
CCL5
CCND2
CD244
CD247
CD69
CD7
CD96
CDK6
CSF2
CST7
CTSW
DPP4
FASLG
GNLY
GPR171
GPR18
GRAP2
GZMA
GZMB
GZMH
GZMM
IFNG
IL12RB2
IL18R1
IL18RAP
IL2RB
KIR2DL1
KIR2DL4
KIR2DS4
KIR3DL2
KLRB1
KLRC3
KLRD1
KLRF1
KLRK1
LCK
LTA
LTB
NAALADL1
NCR3
NKG7
OSM
PRF1
PRR5L
PTGDR
PTGER2
PTPRCAP
PVRIG
S1PR5
SH2D1A
SOCS1
TBX21
TNFSF14
TRDC
TXK
ZAP70
AZU1
BPI
CAMP
CD160
CD2
CDHR1
CEACAM8
DEFA4
ELANE
GFI1
GZMK
KLRC4
MGAM
MS4A3
NME8
PLEKHF1
TEP1
TRBC1
TTC38
ZNF135

## Sheet: Supplementary Table 3
Supplementary Table 3. The results of univariate cox analysis in the CGGA cohort.												Supplementary Table 3. The results of univariate cox analysis in the TCGA cohort.
Tag	p.value	HR	Low 95%CI	High 95%CI								Tag	p.value	HR	Low 95%CI	High 95%CI
APOBEC3G	1.90535e-15	1.78121	1.54484	2.05374								APOBEC3G	4.94901e-20	1.9977	1.72291	2.31633
CDK6	7.3443e-15	1.74672	1.51771	2.01028								CDK6	5.07849e-14	1.88431	1.59784	2.22214
TEP1	1.242e-09	1.65932	1.4092	1.95384								SOCS1	9.10239e-16	1.81188	1.56744	2.09444
CD69	2.04685e-10	1.48866	1.31682	1.68292								DPP4	5.78765e-18	1.67853	1.4924	1.88788
TTC38	3.4632e-06	1.48179	1.25506	1.74949								SH2D1A	2.55769e-15	1.67344	1.47302	1.90113
PRR5L	3.57769e-06	1.45402	1.24113	1.70342								CD2	5.83645e-14	1.64841	1.44687	1.87803
SOCS1	1.71729e-06	1.3975	1.21844	1.60288								TEP1	1.22914e-08	1.64206	1.38442	1.94763
TRDC	6.50178e-08	1.37509	1.22508	1.54348								APOL6	9.72193e-10	1.62903	1.39312	1.90488
APOL6	2.65685e-05	1.35265	1.17485	1.55737								ZAP70	2.12158e-14	1.58816	1.41051	1.78818
DPP4	8.32913e-08	1.33542	1.20139	1.48441								CD96	1.05413e-14	1.57634	1.4046	1.76908
TNFSF14	2.63889e-06	1.31677	1.17393	1.47699								LCK	3.94606e-12	1.57328	1.38426	1.78811
OSM	1.62194e-05	1.31428	1.16073	1.48813								CCL5	1.65083e-08	1.56715	1.34081	1.83169
CCND2	0.00049454	1.30862	1.12485	1.52242								GZMK	7.22634e-12	1.56182	1.37484	1.77423
GNLY	0.000400657	1.30488	1.1261	1.51204								GZMH	8.19461e-10	1.55586	1.35114	1.79158
MGAM	0.000214365	1.29049	1.12748	1.47707								CST7	7.26542e-08	1.55429	1.32377	1.82494
TBX21	8.51296e-06	1.28439	1.15038	1.43401								TTC38	2.18966e-07	1.54909	1.31278	1.82794
IL2RB	0.000131733	1.28256	1.12894	1.45708								NAALADL1	3.33738e-08	1.54304	1.32289	1.79982
ZAP70	0.000610671	1.28064	1.11169	1.47526								NME8	6.88732e-10	1.53859	1.34174	1.76433
PRF1	0.000103791	1.27889	1.1295	1.44803								TBX21	6.16425e-16	1.53366	1.38264	1.70117
GFI1	1.98521e-05	1.27529	1.1405	1.42601								GFI1	5.52381e-10	1.52466	1.33445	1.742
SH2D1A	0.000105931	1.26957	1.12525	1.4324								GPR18	8.12166e-14	1.51666	1.35961	1.69184
GZMH	0.000399156	1.26896	1.1122	1.44782								CD247	1.57647e-10	1.50379	1.32711	1.704
GZMK	8.80706e-05	1.26217	1.12351	1.41794								CD69	9.00356e-08	1.49267	1.28879	1.7288
CCL5	0.00115893	1.25489	1.09425	1.43911								FASLG	8.85371e-09	1.44706	1.27584	1.64126
KLRD1	0.00185656	1.24442	1.08433	1.42814								NKG7	6.92082e-06	1.41321	1.21542	1.64318
CD2	0.000887249	1.2418	1.09294	1.41094								GZMA	1.3881e-06	1.41017	1.22647	1.62138
GZMA	0.00239474	1.2316	1.07664	1.40886								CCND2	0.000148817	1.38347	1.16984	1.63612
CD247	0.00660836	1.22412	1.0579	1.41645								TNFSF14	1.22161e-13	1.3758	1.26453	1.49686
NKG7	0.017216	1.19465	1.03202	1.38292								PTGER2	1.05234e-07	1.37172	1.22088	1.54121
CST7	0.0122048	1.18599	1.03788	1.35524								GNLY	1.0509e-08	1.36701	1.2282	1.52152
PVRIG	0.0391598	1.16804	1.00775	1.35381								CD7	9.8056e-06	1.35689	1.18519	1.55346
CD96	0.0186431	1.16601	1.02596	1.32518								KLRD1	2.80242e-08	1.34767	1.21297	1.49734
PTGER2	0.0292581	1.15505	1.01466	1.31488								CTSW	1.70318e-05	1.34402	1.17459	1.53789
CD7	0.0497563	1.15311	1.00015	1.32947								GPR171	1.75418e-10	1.32905	1.21786	1.45038
IL18RAP	0.0448816	1.15292	1.00325	1.32491								LTB	0.000100546	1.32744	1.15086	1.53111
CD160	0.0395929	1.14609	1.00652	1.30503								IL2RB	1.87682e-05	1.31828	1.16155	1.49615
ELANE	0.046137	0.834015	0.697748	0.996894								PLEKHF1	0.00120819	1.31503	1.11409	1.55222
KLRC3	0.0110704	0.815516	0.696791	0.954469								TXK	1.40123e-05	1.27529	1.14276	1.42318
IL12RB2	0.0106292	0.806645	0.68405	0.951211								CD160	5.28276e-06	1.25955	1.14045	1.39109
BPI	7.20349e-05	0.724987	0.618539	0.849755								IL18RAP	0.000530753	1.25808	1.10485	1.43255
AZU1	4.21126e-05	0.685087	0.571664	0.821014								GRAP2	0.000123331	1.24813	1.11461	1.39766
CDHR1	8.48451e-17	0.531049	0.457528	0.616385								GZMB	0.00553655	1.23912	1.06494	1.44179
												KLRB1	0.0106567	1.2354	1.05038	1.453
												PRF1	0.0100688	1.16513	1.03711	1.30895
												CAMP	0.0402976	1.14379	1.00596	1.3005
												IFNG	0.0250677	1.12322	1.01465	1.24342
												KLRK1	0.00101382	0.651664	0.5048	0.841257
												KLRC4	3.85309e-05	0.636785	0.513641	0.789451
												KLRC3	9.80135e-09	0.563698	0.463396	0.68571
												AZU1	5.10474e-06	0.479377	0.349494	0.657528
												CDHR1	3.16951e-17	0.417743	0.341096	0.511613

## Sheet: Supplementary Table 4
Supplementary Table 4. The results of clustering analysis in the CGGA cohort.														Supplementary Table 4. The results of clustering analysis in the TCGA cohort.
Tag	Cluster													Tag	Cluster
CGGA_1002	C2													TCGA-S9-A6WD-01	C3
CGGA_1003	C4													TCGA-DH-5140-01	C2
CGGA_1010	C4													TCGA-HT-7693-01	C2
CGGA_1014	C1													TCGA-FG-5964-01	C2
CGGA_103	C3													TCGA-HW-8319-01	C3
CGGA_1030	C4													TCGA-FG-7637-01	C3
CGGA_1032	C1													TCGA-VM-A8C9-01	C1
CGGA_1033	C4													TCGA-S9-A7IS-01	C2
CGGA_1037	C2													TCGA-HT-7684-01	C4
CGGA_1048	C2													TCGA-KT-A74X-01	C2
CGGA_1051	C4													TCGA-DU-7302-01	C4
CGGA_1055	C3													TCGA-HT-8018-01	C1
CGGA_1057	C1													TCGA-DU-7007-01	C1
CGGA_1065	C3													TCGA-S9-A6U9-01	C2
CGGA_1066	C2													TCGA-HT-8110-01	C1
CGGA_1087	C4													TCGA-TM-A84I-01	C2
CGGA_1097	C3													TCGA-HT-7902-01	C2
CGGA_1100	C4													TCGA-DB-5281-01	C3
CGGA_1101	C4													TCGA-DU-7013-01	C1
CGGA_1108	C1													TCGA-VM-A8CF-01	C2
CGGA_1111	C1													TCGA-DU-8162-01	C3
CGGA_112	C4													TCGA-IK-7675-01	C4
CGGA_1120	C4													TCGA-DU-7019-01	C2
CGGA_1126	C2													TCGA-R8-A6MK-01	C4
CGGA_1127	C3													TCGA-DU-A7TJ-01	C1
CGGA_1131	C3													TCGA-DB-A64R-01	C4
CGGA_1137	C4													TCGA-HW-7487-01	C4
CGGA_1141	C3													TCGA-S9-A7J0-01	C3
CGGA_1144	C3													TCGA-DU-8163-01	C2
CGGA_1147	C4													TCGA-DU-6400-01	C2
CGGA_1148	C1													TCGA-TM-A7C5-01	C3
CGGA_1152	C1													TCGA-HT-7472-01	C2
CGGA_1155	C2													TCGA-TM-A84B-01	C1
CGGA_1156	C2													TCGA-HT-7609-01	C4
CGGA_1157	C3													TCGA-R8-A73M-01	C4
CGGA_1158	C4													TCGA-HT-A615-01	C2
CGGA_1159	C3													TCGA-HT-7688-01	C3
CGGA_1161	C3													TCGA-DU-6408-01	C3
CGGA_1162	C3													TCGA-EZ-7264-01	C4
CGGA_1169	C2													TCGA-VM-A8C8-01	C4
CGGA_1181	C2													TCGA-DU-A5TS-01	C4
CGGA_1183	C2													TCGA-CS-6668-01	C4
CGGA_1191	C4													TCGA-TQ-A7RJ-01	C3
CGGA_1192	C1													TCGA-DU-8168-01	C4
CGGA_1195	C3													TCGA-HT-8109-01	C3
CGGA_1198	C4													TCGA-DU-5872-01	C2
CGGA_1204	C3													TCGA-HT-7873-01	C4
CGGA_1205	C2													TCGA-E1-5303-01	C4
CGGA_1207	C4													TCGA-DB-A75P-01	C1
CGGA_1211	C3													TCGA-S9-A6WG-01	C1
CGGA_1212	C3													TCGA-VM-A8CB-01	C3
CGGA_1223	C1													TCGA-HT-A5R5-01	C3
CGGA_1226	C3													TCGA-TQ-A7RF-01	C3
CGGA_1228	C1													TCGA-FG-A70Y-01	C4
CGGA_1232	C2													TCGA-E1-5319-01	C3
CGGA_1235	C2													TCGA-DH-A7UV-01	C3
CGGA_1238	C1													TCGA-DH-A669-01	C2
CGGA_1239	C2													TCGA-DB-5280-01	C3
CGGA_1264	C3													TCGA-HW-8320-01	C3
CGGA_1269	C1													TCGA-DB-A64L-01	C2
CGGA_1286	C3													TCGA-CS-4944-01	C2
CGGA_1291	C2													TCGA-HT-7469-01	C3
CGGA_1300	C2													TCGA-FG-6690-01	C2
CGGA_1303	C4													TCGA-TQ-A7RM-01	C3
CGGA_1305	C2													TCGA-DU-A5TT-01	C2
CGGA_1309	C3													TCGA-HT-7606-01	C3
CGGA_1317	C4													TCGA-P5-A77X-01	C3
CGGA_1318	C1													TCGA-HT-7874-01	C4
CGGA_1319	C3													TCGA-TM-A7C4-01	C3
CGGA_1321	C3													TCGA-S9-A7QX-01	C4
CGGA_1334	C1													TCGA-DU-5854-01	C1
CGGA_1335	C3													TCGA-TM-A84G-01	C4
CGGA_1339	C3													TCGA-DU-6405-01	C2
CGGA_1345	C1													TCGA-HT-7681-01	C2
CGGA_135	C1													TCGA-WY-A85D-01	C4
CGGA_1350	C4													TCGA-HW-A5KL-01	C3
CGGA_1361	C3													TCGA-QH-A65X-01	C2
CGGA_1362	C1													TCGA-HT-A61C-01	C1
CGGA_1368	C4													TCGA-DU-A76O-01	C3
CGGA_1369	C4													TCGA-HT-8015-01	C2
CGGA_1377	C3													TCGA-FG-8182-01	C3
CGGA_1386	C3													TCGA-DB-5279-01	C2
CGGA_1389	C2													TCGA-E1-5307-01	C4
CGGA_1401	C3													TCGA-HT-7467-01	C3
CGGA_1404	C3													TCGA-WY-A858-01	C2
CGGA_1407	C2													TCGA-HT-A74O-01	C2
CGGA_1413	C3													TCGA-S9-A7R1-01	C4
CGGA_1416	C2													TCGA-DU-6396-01	C1
CGGA_1417	C2													TCGA-HT-7477-01	C2
CGGA_1421	C2													TCGA-HT-A618-01	C1
CGGA_1424	C4													TCGA-E1-A7YI-01	C3
CGGA_1427	C2													TCGA-DU-7301-01	C2
CGGA_1431	C2													TCGA-DH-A7UT-01	C4
CGGA_1435	C1													TCGA-HT-8558-01	C4
CGGA_1440	C3													TCGA-S9-A7J2-01	C4
CGGA_1446	C4													TCGA-HT-7879-01	C3
CGGA_1454	C4													TCGA-DU-7009-01	C4
CGGA_1455	C4													TCGA-TQ-A7RG-01	C2
CGGA_1463	C4													TCGA-S9-A89V-01	C2
CGGA_1469	C4													TCGA-RY-A83Z-01	C3
CGGA_1471	C2													TCGA-P5-A5F4-01	C2
CGGA_1474	C4													TCGA-FG-A711-01	C4
CGGA_1477	C3													TCGA-VM-A8CD-01	C2
CGGA_1482	C2													TCGA-HT-7880-01	C2
CGGA_1488	C4													TCGA-HT-A74J-01	C3
CGGA_1497	C4													TCGA-RY-A840-01	C4
CGGA_1502	C1													TCGA-TM-A84R-01	C3
CGGA_1504	C2													TCGA-DU-6403-01	C2
CGGA_1508	C2													TCGA-HT-7471-01	C2
CGGA_1514	C4													TCGA-DB-A4XA-01	C2
CGGA_1516	C4													TCGA-TM-A7CA-01	C4
CGGA_1517	C3													TCGA-DU-6393-01	C3
CGGA_1518	C2													TCGA-HT-7694-01	C4
CGGA_1523	C1													TCGA-HT-7485-01	C4
CGGA_1525	C2													TCGA-CS-5397-01	C2
CGGA_1526	C2													TCGA-DU-6401-01	C3
CGGA_1527	C2													TCGA-DU-6392-01	C2
CGGA_1528	C2													TCGA-S9-A7R8-01	C4
CGGA_1530	C2													TCGA-S9-A6WP-01	C2
CGGA_1536	C2													TCGA-S9-A6U1-01	C3
CGGA_1544	C4													TCGA-HT-7475-01	C3
CGGA_1552	C4													TCGA-E1-A7YV-01	C2
CGGA_1557	C3													TCGA-DH-5143-01	C4
CGGA_1562	C3													TCGA-S9-A6WO-01	C3
CGGA_1563	C1													TCGA-W9-A837-01	C4
CGGA_1565	C2													TCGA-DU-8166-01	C3
CGGA_1566	C3													TCGA-S9-A7IX-01	C1
CGGA_1567	C1													TCGA-FG-A60J-01	C2
CGGA_1568	C2													TCGA-QH-A65S-01	C3
CGGA_1569	C4													TCGA-DB-5274-01	C2
CGGA_1579	C4													TCGA-TQ-A7RK-01	C4
CGGA_1580	C1													TCGA-DB-A4XF-01	C3
CGGA_1583	C3													TCGA-TQ-A7RI-01	C3
CGGA_1587	C1													TCGA-P5-A781-01	C3
CGGA_1588	C1													TCGA-R8-A6MO-01	C2
CGGA_1598	C2													TCGA-HT-7854-01	C2
CGGA_1606	C1													TCGA-DB-A4XH-01	C3
CGGA_1617	C3													TCGA-VM-A8CA-01	C2
CGGA_1618	C4													TCGA-FG-7636-01	C4
CGGA_1619	C2													TCGA-QH-A6X3-01	C3
CGGA_1620	C3													TCGA-TM-A84L-01	C2
CGGA_1621	C4													TCGA-WH-A86K-01	C3
CGGA_1623	C2													TCGA-VV-A829-01	C3
CGGA_1627	C3													TCGA-DB-A4XE-01	C4
CGGA_1630	C3													TCGA-HT-7860-01	C1
CGGA_1640	C2													TCGA-DB-A75L-01	C4
CGGA_1642	C3													TCGA-TQ-A7RH-01	C2
CGGA_1645	C3													TCGA-HT-7616-01	C1
CGGA_1647	C3													TCGA-HT-8104-01	C2
CGGA_1648	C3													TCGA-S9-A7IY-01	C2
CGGA_1649	C2													TCGA-HT-7476-01	C2
CGGA_165	C3													TCGA-DU-6394-01	C3
CGGA_1653	C3													TCGA-HT-8111-01	C2
CGGA_1655	C2													TCGA-HT-A74H-01	C2
CGGA_1657	C3													TCGA-HT-7691-01	C2
CGGA_1661	C3													TCGA-P5-A77W-01	C4
CGGA_1662	C2													TCGA-FG-7638-01	C3
CGGA_1664	C3													TCGA-E1-A7YY-01	C4
CGGA_1667	C3													TCGA-FG-8181-01	C3
CGGA_1669	C2													TCGA-FG-A4MX-01	C4
CGGA_1671	C2													TCGA-HT-A61A-01	C3
CGGA_1673	C4													TCGA-WY-A85A-01	C3
CGGA_1675	C1													TCGA-DH-A66G-01	C2
CGGA_1679	C3													TCGA-HT-A617-01	C1
CGGA_1680	C1													TCGA-HT-A61B-01	C2
CGGA_1686	C2													TCGA-DU-A6S6-01	C4
CGGA_1689	C3													TCGA-S9-A6WH-01	C4
CGGA_1693	C2													TCGA-QH-A86X-01	C3
CGGA_1696	C3													TCGA-HT-7611-01	C3
CGGA_1700	C2													TCGA-RY-A83Y-01	C2
CGGA_1701	C3													TCGA-DU-A5TW-01	C4
CGGA_1703	C3													TCGA-FG-A713-01	C4
CGGA_1704	C3													TCGA-DH-5144-01	C3
CGGA_1714	C1													TCGA-HT-8564-01	C1
CGGA_1715	C1													TCGA-QH-A65Z-01	C4
CGGA_1718	C2													TCGA-WY-A85C-01	C3
CGGA_1720	C3													TCGA-QH-A6CZ-01	C3
CGGA_1721	C3													TCGA-E1-A7YJ-01	C1
CGGA_1723	C3													TCGA-CS-6667-01	C3
CGGA_1725	C3													TCGA-DH-A7UR-01	C2
CGGA_1731	C3													TCGA-DU-A5TP-01	C1
CGGA_1737	C4													TCGA-TM-A84O-01	C2
CGGA_1738	C2													TCGA-E1-5304-01	C4
CGGA_1743	C3													TCGA-S9-A6U0-01	C1
CGGA_1745	C4													TCGA-S9-A7QY-01	C3
CGGA_1747	C2													TCGA-FG-8187-01	C3
CGGA_1791	C4													TCGA-DU-5853-01	C2
CGGA_1809	C1													TCGA-E1-A7YM-01	C3
CGGA_1829	C2													TCGA-DB-A64P-01	C3
CGGA_1850	C3													TCGA-DB-5273-01	C2
CGGA_1854	C4													TCGA-HT-7603-01	C4
CGGA_1862	C2													TCGA-DU-7292-01	C2
CGGA_1875	C1													TCGA-S9-A6TS-01	C3
CGGA_1882	C3													TCGA-DU-A6S3-01	C3
CGGA_1902	C2													TCGA-DB-A75O-01	C3
CGGA_1903	C2													TCGA-TM-A84J-01	C4
CGGA_28	C4													TCGA-HT-7877-01	C3
CGGA_290	C3													TCGA-S9-A6TZ-01	C2
CGGA_320	C3													TCGA-DU-6407-01	C4
CGGA_42	C2													TCGA-DU-8167-01	C2
CGGA_474	C2													TCGA-HT-8108-01	C2
CGGA_482	C1													TCGA-QH-A65R-01	C3
CGGA_503	C3													TCGA-TQ-A7RV-01	C3
CGGA_521	C1													TCGA-CS-4943-01	C3
CGGA_583	C4													TCGA-FG-A60L-01	C2
CGGA_634	C3													TCGA-CS-6670-01	C4
CGGA_663	C3													TCGA-P5-A72Z-01	C4
CGGA_705	C1													TCGA-R8-A6ML-01	C3
CGGA_707	C2													TCGA-S9-A7IZ-01	C3
CGGA_721	C2													TCGA-TM-A84M-01	C4
CGGA_809	C3													TCGA-FG-A87Q-01	C1
CGGA_852	C1													TCGA-DB-A4XG-01	C4
CGGA_861	C2													TCGA-TM-A7CF-01	C4
CGGA_863	C3													TCGA-WY-A859-01	C4
CGGA_889	C2													TCGA-E1-5318-01	C4
CGGA_890	C3													TCGA-S9-A7QZ-01	C3
CGGA_901	C3													TCGA-DB-A75M-01	C3
CGGA_903	C3													TCGA-HT-A5R9-01	C2
CGGA_D28	C4													TCGA-FG-6688-01	C2
CGGA_J73	C2													TCGA-P5-A737-01	C3
CGGA_P103	C4													TCGA-QH-A6CW-01	C3
CGGA_P108	C2													TCGA-S9-A7R7-01	C1
CGGA_P110	C1													TCGA-DB-A64O-01	C3
CGGA_P111	C2													TCGA-HT-7474-01	C3
CGGA_P113	C4													TCGA-HT-7470-01	C4
CGGA_P115	C4													TCGA-HT-7605-01	C3
CGGA_P121	C3													TCGA-HT-8010-01	C3
CGGA_P128	C3													TCGA-DU-5852-01	C1
CGGA_P13	C4													TCGA-E1-A7YL-01	C1
CGGA_P131	C2													TCGA-FG-8188-01	C4
CGGA_P132	C2													TCGA-S9-A7R4-01	C4
CGGA_P137	C4													TCGA-WY-A85B-01	C2
CGGA_P142	C2													TCGA-DU-A6S8-01	C3
CGGA_P144	C1													TCGA-FG-A6J1-01	C2
CGGA_P145	C2													TCGA-HT-A614-01	C3
CGGA_P147	C1													TCGA-HT-8107-01	C3
CGGA_P151	C2													TCGA-KT-A7W1-01	C1
CGGA_P153	C4													TCGA-QH-A6CS-01	C4
CGGA_P155	C1													TCGA-TQ-A8XE-01	C3
CGGA_P156	C3													TCGA-DU-6399-01	C3
CGGA_P157	C1													TCGA-DU-6395-01	C3
CGGA_P158	C4													TCGA-DB-A64S-01	C2
CGGA_P159	C1													TCGA-P5-A5F0-01	C3
CGGA_P165	C4													TCGA-HW-7490-01	C2
CGGA_P17	C3													TCGA-HT-7677-01	C2
CGGA_P172	C4													TCGA-HT-7481-01	C3
CGGA_P173	C2													TCGA-FG-5965-01	C2
CGGA_P174	C2													TCGA-DB-5277-01	C3
CGGA_P176	C3													TCGA-HT-8013-01	C3
CGGA_P177	C2													TCGA-HT-7857-01	C1
CGGA_P179	C3													TCGA-F6-A8O4-01	C3
CGGA_P18	C3													TCGA-HT-A4DS-01	C1
CGGA_P181	C2													TCGA-DU-5870-01	C3
CGGA_P183	C4													TCGA-DU-A7T6-01	C2
CGGA_P19	C2													TCGA-DU-5855-01	C3
CGGA_P20	C3													TCGA-HW-8321-01	C2
CGGA_P21	C3													TCGA-P5-A72W-01	C3
CGGA_P23	C4													TCGA-FG-6691-01	C3
CGGA_P265	C4													TCGA-WY-A85E-01	C3
CGGA_P266	C4													TCGA-E1-5302-01	C2
CGGA_P27	C4													TCGA-E1-A7Z3-01	C3
CGGA_P271	C4													TCGA-HT-7686-01	C2
CGGA_P30	C1													TCGA-HT-8113-01	C2
CGGA_P31	C1													TCGA-QH-A6CX-01	C2
CGGA_P422	C3													TCGA-VW-A7QS-01	C4
CGGA_P437	C2													TCGA-DU-7300-01	C2
CGGA_P468	C3													TCGA-HT-A5R7-01	C3
CGGA_P83	C2													TCGA-S9-A6U6-01	C3
CGGA_P84	C3													TCGA-DU-6402-01	C1
CGGA_P86	C3													TCGA-HT-A5RB-01	C4
CGGA_P93	C2													TCGA-P5-A780-01	C2
CGGA_1006	C1													TCGA-E1-A7YU-01	C3
CGGA_1034	C1													TCGA-HT-7620-01	C3
CGGA_1079	C1													TCGA-DH-A7US-01	C3
CGGA_1263	C2													TCGA-E1-A7YH-01	C4
CGGA_1280	C3													TCGA-TM-A84H-01	C3
CGGA_1281	C4													TCGA-P5-A5EY-01	C2
CGGA_1284	C1													TCGA-E1-A7YO-01	C3
CGGA_1292	C1													TCGA-S9-A6TV-01	C1
CGGA_1340	C3													TCGA-HT-7480-01	C3
CGGA_1408	C1													TCGA-DH-5142-01	C1
CGGA_235	C4													TCGA-HW-7489-01	C3
CGGA_269	C1													TCGA-CS-6186-01	C4
CGGA_276	C2													TCGA-FG-A4MY-01	C3
CGGA_323	C2													TCGA-E1-A7YE-01	C2
CGGA_330	C1													TCGA-S9-A7R3-01	C3
CGGA_426	C1													TCGA-HT-7601-01	C1
CGGA_448	C1													TCGA-TQ-A7RN-01	C4
CGGA_488	C2													TCGA-HT-7689-01	C4
CGGA_493	C4													TCGA-DU-7299-01	C3
CGGA_541	C2													TCGA-TM-A84C-01	C2
CGGA_564	C1													TCGA-E1-A7Z2-01	C4
CGGA_565	C4													TCGA-HT-A4DV-01	C3
CGGA_578	C1													TCGA-TQ-A7RP-01	C2
CGGA_599	C2													TCGA-QH-A6X8-01	C3
CGGA_616	C1													TCGA-CS-5396-01	C2
CGGA_633	C2													TCGA-QH-A6X9-01	C3
CGGA_638	C1													TCGA-HW-7495-01	C4
CGGA_643	C1													TCGA-RY-A843-01	C3
CGGA_659	C2													TCGA-HT-7687-01	C2
CGGA_727	C2													TCGA-DU-6410-01	C4
CGGA_766	C4													TCGA-FG-7643-01	C2
CGGA_791	C1													TCGA-FG-6689-01	C3
CGGA_796	C2													TCGA-DU-5847-01	C1
CGGA_807	C4													TCGA-HT-7473-01	C2
CGGA_871	C1													TCGA-DB-A4XC-01	C2
CGGA_D11	C1													TCGA-DU-8164-01	C4
CGGA_D16	C1													TCGA-FG-A4MT-01	C4
CGGA_D44	C1													TCGA-DU-A76K-01	C2
CGGA_J030	C4													TCGA-DU-A6S7-01	C4
CGGA_1005	C4													TCGA-HW-A5KM-01	C2
CGGA_1013	C4													TCGA-FG-8191-01	C2
CGGA_1020	C3													TCGA-HT-7680-01	C2
CGGA_1027	C1													TCGA-VW-A8FI-01	C1
CGGA_1031	C3													TCGA-E1-A7YS-01	C3
CGGA_1046	C4													TCGA-DU-8161-01	C1
CGGA_1113	C3													TCGA-DU-A76R-01	C3
CGGA_1146	C1													TCGA-E1-5322-01	C3
CGGA_1160	C1													TCGA-CS-5394-01	C4
CGGA_1189	C4													TCGA-DB-A64X-01	C3
CGGA_1190	C1													TCGA-DU-A7TD-01	C1
CGGA_1307	C1													TCGA-P5-A5F2-01	C4
CGGA_1322	C4													TCGA-DU-7298-01	C3
CGGA_1330	C2													TCGA-DU-A7TC-01	C4
CGGA_1406	C1													TCGA-DU-A7TB-01	C4
CGGA_236	C3													TCGA-HT-7483-01	C3
CGGA_241	C2													TCGA-QH-A870-01	C4
CGGA_251	C1													TCGA-FG-6692-01	C1
CGGA_252	C4													TCGA-DH-A66B-01	C2
CGGA_254	C4													TCGA-RY-A83X-01	C4
CGGA_256	C3													TCGA-P5-A731-01	C2
CGGA_261	C4													TCGA-QH-A6X5-01	C3
CGGA_267	C4													TCGA-CS-6666-01	C2
CGGA_273	C1													TCGA-DU-6404-01	C2
CGGA_283	C2													TCGA-CS-4941-01	C1
CGGA_300	C4													TCGA-HT-7855-01	C4
CGGA_333	C1													TCGA-DB-A4X9-01	C4
CGGA_337	C1													TCGA-DU-6397-01	C2
CGGA_446	C4													TCGA-DU-8158-01	C1
CGGA_479	C2													TCGA-HT-7604-01	C4
CGGA_485	C3													TCGA-DU-A5TY-01	C1
CGGA_490	C4													TCGA-CS-4938-01	C4
CGGA_501	C4													TCGA-HT-7858-01	C1
CGGA_502	C3													TCGA-DB-5278-01	C3
CGGA_510	C3													TCGA-DU-5871-01	C3
CGGA_543	C4													TCGA-DB-A64V-01	C1
CGGA_551	C3													TCGA-HT-7608-01	C4
CGGA_560	C2													TCGA-S9-A6TX-01	C3
CGGA_580	C4													TCGA-P5-A5EZ-01	C1
CGGA_591	C3													TCGA-DU-7290-01	C1
CGGA_598	C4													TCGA-HT-7856-01	C3
CGGA_601	C2													TCGA-DU-A5TR-01	C1
CGGA_607	C4													TCGA-DU-A7TG-01	C3
CGGA_632	C3													TCGA-S9-A6TY-01	C4
CGGA_635	C4													TCGA-HT-8563-01	C1
CGGA_641	C3													TCGA-TQ-A7RO-01	C2
CGGA_642	C4													TCGA-HT-A74L-01	C4
CGGA_655	C4													TCGA-TQ-A7RW-01	C2
CGGA_662	C3													TCGA-S9-A6WN-01	C1
CGGA_666	C4													TCGA-E1-A7YK-01	C1
CGGA_671	C4													TCGA-DU-7006-01	C1
CGGA_675	C4													TCGA-P5-A5EV-01	C2
CGGA_685	C4													TCGA-HW-A5KK-01	C1
CGGA_689	C4													TCGA-DB-A64Q-01	C4
CGGA_698	C2													TCGA-HT-A619-01	C2
CGGA_704	C2													TCGA-FG-8186-01	C2
CGGA_715	C4													TCGA-CS-6188-01	C2
CGGA_725	C3													TCGA-HT-7468-01	C3
CGGA_752	C3													TCGA-HT-7884-01	C4
CGGA_757	C4													TCGA-E1-A7Z6-01	C4
CGGA_760	C4													TCGA-E1-A7YD-01	C1
CGGA_762	C4													TCGA-DU-7008-01	C3
CGGA_785	C4													TCGA-FG-7641-01	C4
CGGA_812	C1													TCGA-S9-A6WM-01	C1
CGGA_815	C1													TCGA-FG-A60K-01	C3
CGGA_818	C1													TCGA-QH-A6XA-01	C3
CGGA_834	C3													TCGA-VM-A8CE-01	C3
CGGA_835	C4													TCGA-P5-A72U-01	C1
CGGA_838	C4													TCGA-DB-A4XB-01	C2
CGGA_843	C4													TCGA-DB-5270-01	C2
CGGA_856	C4													TCGA-E1-5311-01	C3
CGGA_858	C4													TCGA-S9-A6U8-01	C3
CGGA_864	C4													TCGA-DU-7015-01	C2
CGGA_884	C4													TCGA-QH-A65V-01	C4
CGGA_892	C2													TCGA-HT-7690-01	C1
CGGA_893	C4													TCGA-TM-A84Q-01	C2
CGGA_898	C4													TCGA-VV-A86M-01	C2
CGGA_904	C3													TCGA-HT-7676-01	C3
CGGA_905	C3													TCGA-DU-7010-01	C2
CGGA_908	C4													TCGA-HW-7486-01	C3
CGGA_909	C2													TCGA-QH-A6X4-01	C4
CGGA_D04	C4													TCGA-S9-A6U2-01	C3
CGGA_D07	C2													TCGA-S9-A6TU-01	C3
CGGA_D15	C4													TCGA-QH-A6CV-01	C2
CGGA_D20	C4													TCGA-E1-5305-01	C4
CGGA_D21	C1													TCGA-HT-7882-01	C1
CGGA_D24	C1													TCGA-DU-5874-01	C3
CGGA_D29	C4													TCGA-S9-A6UA-01	C1
CGGA_D47	C1													TCGA-CS-4942-01	C2
CGGA_D52	C4													TCGA-DU-7018-01	C4
CGGA_277	C2													TCGA-S9-A7J3-01	C3
CGGA_J023	C4													TCGA-FG-5963-01	C1
CGGA_1004	C1													TCGA-HT-7610-01	C3
CGGA_1071	C1													TCGA-DU-A7TA-01	C2
CGGA_1246	C2													TCGA-S9-A7R2-01	C1
CGGA_243	C4													TCGA-P5-A5F6-01	C4
CGGA_247	C2													TCGA-HT-A74K-01	C3
CGGA_738	C1													TCGA-CS-5393-01	C3
														TCGA-FG-8189-01	C4
														TCGA-DU-6406-01	C1
														TCGA-DB-5275-01	C3
														TCGA-CS-5395-01	C3
														TCGA-FG-A6J3-01	C1
														TCGA-HT-7607-01	C3
														TCGA-DU-A5TU-01	C2
														TCGA-FG-A710-01	C2
														TCGA-TM-A84S-01	C3
														TCGA-S9-A6WI-01	C4
														TCGA-HT-7482-01	C4
														TCGA-DU-7306-01	C3
														TCGA-CS-6290-01	C2
														TCGA-HW-8322-01	C2
														TCGA-P5-A5F1-01	C2
														TCGA-DU-6542-01	C2
														TCGA-CS-6669-01	C4
														TCGA-S9-A6WL-01	C3
														TCGA-DU-A7TI-01	C3
														TCGA-TM-A84F-01	C1
														TCGA-HW-7491-01	C3
														TCGA-S9-A7IQ-01	C4
														TCGA-FG-5962-01	C3
														TCGA-S9-A89Z-01	C1
														TCGA-HT-8105-01	C2
														TCGA-S9-A6TW-01	C2
														TCGA-HT-7478-01	C1
														TCGA-DU-7309-01	C3
														TCGA-HT-8011-01	C2
														TCGA-RY-A845-01	C4
														TCGA-FG-7634-01	C2
														TCGA-HW-A5KJ-01	C1
														TCGA-DU-7014-01	C3
														TCGA-DU-7294-01	C3
														TCGA-DB-A75K-01	C2
														TCGA-QH-A6XC-01	C2
														TCGA-TQ-A7RR-01	C3
														TCGA-TM-A84T-01	C3
														TCGA-FG-A70Z-01	C1
														TCGA-FG-A4MW-01	C2
														TCGA-HT-8114-01	C1
														TCGA-VM-A8CH-01	C3
														TCGA-HT-A5RC-01	C2
														TCGA-S9-A7J1-01	C3
														TCGA-FG-A4MU-01	C1
														TCGA-DU-A6S2-01	C2
														TCGA-DU-A7T8-01	C2
														TCGA-DB-A4XD-01	C4
														TCGA-HT-7695-01	C3
														TCGA-DH-A7UU-01	C3
														TCGA-DH-A66F-01	C3
														TCGA-S9-A6U5-01	C1
														TCGA-S9-A6WQ-01	C3
														TCGA-DH-5141-01	C3
														TCGA-P5-A733-01	C4
														TCGA-DU-8165-01	C1
														TCGA-RY-A847-01	C3
														TCGA-P5-A735-01	C4
														TCGA-FG-A6IZ-01	C3
														TCGA-QH-A6CY-01	C3
														TCGA-HT-8019-01	C4
														TCGA-HT-7881-01	C3
														TCGA-E1-A7Z4-01	C4
														TCGA-FN-7833-01	C2
														TCGA-TM-A7C3-01	C1
														TCGA-FG-A87N-01	C3
														TCGA-E1-A7YW-01	C4
														TCGA-E1-A7YQ-01	C1
														TCGA-DU-A76L-01	C1
														TCGA-HT-7602-01	C3
														TCGA-HT-7692-01	C3
														TCGA-S9-A6UB-01	C4
														TCGA-HT-A5RA-01	C1
														TCGA-HW-7493-01	C2
														TCGA-S9-A7QW-01	C4
														TCGA-P5-A736-01	C2
														TCGA-P5-A5EX-01	C1
														TCGA-S9-A6WE-01	C3
														TCGA-DH-A66D-01	C2
														TCGA-FG-8185-01	C4
														TCGA-DB-A64W-01	C4
														TCGA-P5-A730-01	C3
														TCGA-DU-5849-01	C2
														TCGA-F6-A8O3-01	C3
														TCGA-P5-A5EW-01	C3
														TCGA-DU-7011-01	C2
														TCGA-HT-7479-01	C2
														TCGA-DB-A64U-01	C4
														TCGA-HT-8012-01	C3
														TCGA-DU-7304-01	C3
														TCGA-QH-A6CU-01	C3
														TCGA-TQ-A7RQ-01	C3
														TCGA-HT-A616-01	C3
														TCGA-IK-8125-01	C3
														TCGA-E1-A7YN-01	C1
														TCGA-HT-7875-01	C4
														TCGA-P5-A72X-01	C2
														TCGA-DU-7012-01	C1

## Sheet: Supplementary Table 5
Supplementary Table 5. The information of univariate Cox regression analysis.
Genes	p.value	HR	Low 95%CI	High 95%CI
CD2	5.83645e-14	1.64841	1.44687	1.87803
CD3E	1.37483e-11	1.58811	1.38881	1.81601
GZMA	1.3881e-06	1.41017	1.22647	1.62138
CD3D	1.59095e-10	1.53972	1.34898	1.75742
IL2RG	1.49641e-12	1.70671	1.47178	1.97913
CCL5	1.65083e-08	1.56715	1.34081	1.83169
CASP4	2.90171e-19	1.98612	1.70965	2.3073
CARD16	7.47155e-20	1.98895	1.71574	2.30567
S100A4	7.48992e-12	1.69963	1.46024	1.97827
NKG7	6.92082e-06	1.41321	1.21542	1.64318
LSP1	6.41451e-17	1.96046	1.67415	2.29574
CXCL10	7.99922e-13	1.63871	1.43151	1.8759
SERPING1	1.82959e-19	2.08198	1.77541	2.44149
DPYD	1.29117e-16	1.80767	1.57114	2.0798
ABCC3	8.29902e-20	1.67271	1.49744	1.8685
C1RL	2.31761e-16	1.71464	1.50741	1.95036
PLBD1	3.46723e-16	1.92981	1.64779	2.2601
CCR5	7.36835e-10	1.57462	1.36275	1.81941
SP100	7.27988e-21	1.99435	1.72619	2.30417
CD52	2.76953e-07	1.49065	1.2801	1.73582
CIITA	6.45541e-11	1.54795	1.35777	1.76477
CSTA	9.17616e-09	1.59041	1.35758	1.86318
APOL1	7.51403e-08	1.49402	1.29068	1.72939
CXCL9	4.47229e-08	1.38839	1.2344	1.56157
CASP1	2.28738e-11	1.79226	1.51051	2.12657
OSMR	8.07762e-20	1.94577	1.6862	2.24529
C1R	9.81843e-13	1.68363	1.45908	1.94273
RAC2	1.21984e-08	1.58995	1.3555	1.86495
TNFRSF14	5.12552e-15	1.90183	1.61896	2.23413
RNF135	4.30632e-14	2.06216	1.70899	2.4883
ANXA1	3.99041e-18	2.00474	1.71335	2.34569
GPR65	2.14851e-08	1.48432	1.29268	1.70438
PDCD1LG2	1.51531e-15	1.90416	1.62543	2.23068
TIMP1	4.13016e-20	2.03699	1.75006	2.37098
FAM114A1	1.33683e-18	1.86593	1.62397	2.14393
CLIC1	2.63643e-21	2.34919	1.9688	2.80308
GBP1	1.52012e-15	1.77739	1.54311	2.04724
SLAMF8	1.08286e-08	1.5422	1.32936	1.78912
EMP3	8.07596e-29	2.45427	2.09563	2.87428
GSDMD	5.96227e-16	1.94342	1.65446	2.28284
HLA-DQA1	2.8729e-07	1.50383	1.28682	1.75743
STEAP3	2.08294e-22	2.19526	1.87393	2.5717
SERPINA1	3.79112e-09	1.59023	1.36288	1.85551
TYMP	2.53089e-10	1.61637	1.3929	1.8757
CHI3L1	7.61221e-23	2.28621	1.93902	2.69557
C1S	6.04401e-11	1.5706	1.37193	1.79805
S100A11	5.32101e-13	1.9626	1.6342	2.35701
CD58	1.43009e-25	2.45482	2.07437	2.90506
MYL12A	1.17212e-15	1.9575	1.66074	2.30729
HLA-B	4.56981e-08	1.6106	1.35764	1.91069
PLSCR1	3.43549e-20	2.06465	1.76931	2.40929
PLAU	2.73099e-12	1.60995	1.40874	1.83991
HLA-F	2.53919e-09	1.65848	1.40425	1.95873
EMILIN2	1.2043e-14	1.56518	1.39682	1.75384
PDPN	4.01195e-21	2.0462	1.76334	2.37444
TNFRSF12A	4.4728e-20	2.13699	1.81701	2.51331
TAGLN2	1.99664e-22	2.10457	1.81195	2.44444
FSTL1	3.06413e-19	1.89386	1.64711	2.17758
NNMT	9.27343e-16	1.57917	1.41265	1.76533
SERPINH1	2.28997e-15	1.88388	1.61074	2.20334
ANXA2	2.56742e-15	1.84753	1.58685	2.15102
MAPT	1.09212e-17	0.515289	0.442741	0.599726
APOBEC3C	1.65278e-18	2.12971	1.79895	2.52129
ZDHHC22	3.45462e-20	0.445162	0.374688	0.528891
RAB34	3.49686e-23	2.25247	1.91851	2.64456
MSR1	2.84526e-13	1.74578	1.50325	2.02744
OSCAR	8.43362e-07	1.4927	1.27274	1.75067
PYGL	4.84614e-16	1.95189	1.66076	2.29406
SECTM1	3.59944e-08	1.4753	1.2847	1.69418
NMI	1.42914e-14	1.84659	1.57947	2.15887
CFI	6.1474e-10	1.59293	1.37448	1.8461
TNFRSF11B	1.53648e-20	1.71541	1.53082	1.92226
P3H2	3.17052e-13	1.6829	1.46304	1.9358
HLA-DPB1	7.63083e-08	1.60997	1.35335	1.91524
HLA-DOA	3.91662e-07	1.52151	1.29375	1.78935
CLEC5A	7.56508e-15	1.67611	1.47149	1.90919
MSN	6.57794e-24	2.60416	2.16206	3.13666
TCIRG1	4.13087e-10	1.65622	1.41382	1.94019
CFH	1.84616e-12	1.65253	1.43703	1.90036
HLA-C	4.5165e-09	1.66109	1.40194	1.96814
HLA-DMA	9.70269e-07	1.54371	1.29749	1.83666
HLA-DRB1	8.53759e-07	1.55491	1.3043	1.85366
LPAR6	1.11359e-08	1.62506	1.37569	1.91964
CA3	2.85282e-14	1.52245	1.36614	1.69663
TMSB4X	3.21666e-14	2.02678	1.68878	2.43244
MRC2	1.25591e-14	1.97971	1.66419	2.35504
HLA-A	9.80976e-08	1.59918	1.34562	1.90052
IGFBP2	9.04529e-29	2.24116	1.94424	2.58341
EVA1C	2.79704e-14	1.88746	1.60251	2.22308
CXCL11	3.95492e-12	1.51349	1.3463	1.70145
SAMD9L	1.58344e-20	2.11393	1.80503	2.4757
MAP3K7CL	4.59061e-11	1.51952	1.34157	1.72108
SERPINB1	1.01885e-11	1.89577	1.57676	2.27933
METTL7B	2.5933e-23	2.23128	1.90492	2.61356
HLA-DPA1	5.26798e-08	1.59667	1.34904	1.88974
GIMAP2	1.54397e-11	1.77155	1.50028	2.09187
COL5A2	6.75315e-17	1.84996	1.60126	2.13728
BCL7A	2.08485e-12	0.562034	0.478612	0.659997
CD74	8.58958e-08	1.63238	1.36432	1.9531
PTX3	2.4062e-19	1.8905	1.6455	2.17198
SRPX2	4.28743e-16	1.81045	1.56906	2.08896
PLAUR	3.2861e-15	1.70981	1.49625	1.95385
HLA-DRA	5.68239e-08	1.64223	1.37294	1.96434
SMIM3	1.01818e-11	1.71074	1.46559	1.9969
NAMPT	9.74425e-18	1.87844	1.62641	2.16952
PDLIM1	7.30678e-09	1.55949	1.34148	1.81292
HLA-DQB2	3.79305e-06	1.4173	1.22248	1.64318
RDH10	8.52594e-09	1.4353	1.26917	1.62318
ITGA5	6.22623e-12	1.56146	1.37516	1.773
ARHGAP18	4.35321e-15	1.895	1.61527	2.22316
IRF1	5.61686e-10	1.58458	1.37001	1.83274
B2M	2.32003e-07	1.59966	1.33877	1.91139
GDF15	3.78416e-23	1.86288	1.6472	2.10681
PARP9	6.6297e-16	1.88991	1.61942	2.20557
SOD2	6.03344e-14	1.68322	1.46927	1.92833
FAM20C	4.91227e-14	1.72514	1.49698	1.98807
APOBR	7.18277e-15	1.9062	1.62031	2.24253
EMILIN1	2.06233e-18	1.93386	1.66838	2.24159
CTSZ	3.01977e-07	1.61048	1.34204	1.93261
PHYHIPL	1.40454e-18	0.494988	0.423206	0.578947
TEAD3	2.82809e-19	1.89002	1.64473	2.1719
HLA-DMB	1.48056e-07	1.59305	1.33907	1.8952
G0S2	1.21781e-13	1.6811	1.46542	1.92853
SFRP4	8.1535e-09	1.51362	1.31467	1.74267
SHISA7	1.16394e-12	0.555935	0.47286	0.653606
GPX8	7.19415e-23	1.9082	1.67787	2.17016
ENG	6.80607e-07	1.48679	1.27139	1.73869
HLA-DQB1	8.65641e-06	1.46515	1.2382	1.73369
FCGR3A	1.56517e-06	1.48447	1.26344	1.74418
SLC43A3	4.75384e-11	1.5803	1.37888	1.81114
CLCF1	1.39762e-14	1.57842	1.40522	1.77297
FCGBP	5.66651e-06	1.46771	1.24359	1.73223
PPIC	2.04391e-15	1.75663	1.52852	2.01878
TUBA1C	1.68045e-17	2.02996	1.72466	2.38931
ITGAL	4.57491e-08	1.52735	1.31219	1.77779
TUB	8.90864e-15	0.513121	0.433483	0.60739
FCGR2A	2.62481e-08	1.60371	1.35793	1.89396
RAB32	5.80011e-11	1.86568	1.54803	2.24852
CTSC	8.59645e-09	1.62275	1.37614	1.91354
XKR8	5.65986e-18	1.99607	1.70638	2.33494
CAPG	1.27784e-15	2.13438	1.77243	2.57025
CRY2	9.13417e-17	0.501696	0.426417	0.590265
DUSP26	3.4389e-14	0.558133	0.480017	0.648961
EPSTI1	2.06879e-13	1.62932	1.4303	1.85602
JPH3	2.53564e-15	0.48611	0.406566	0.581217
PSMB9	4.76281e-09	1.6699	1.40653	1.9826
MYOF	1.303e-09	1.55112	1.34604	1.78745
DNM3	9.43957e-13	0.575948	0.494986	0.670152
NAP1L3	1.57682e-18	0.46962	0.396739	0.55589
IQGAP1	2.86627e-17	2.18291	1.82144	2.61612
PARP12	2.30156e-16	1.76707	1.54239	2.02449
KCNB1	8.54543e-16	0.50417	0.426705	0.595699
FBP1	7.28569e-10	1.62483	1.39229	1.8962
LY96	3.07604e-06	1.51065	1.27028	1.7965
ATP6V1G2	2.04291e-21	0.457907	0.389774	0.53795
TNFRSF1A	7.83868e-11	1.71889	1.46	2.02369
ACTN1	3.00776e-10	1.58477	1.37322	1.82891
PHACTR3	1.59537e-08	0.643289	0.552019	0.749648
PLP2	1.29266e-18	2.10137	1.78125	2.47902
HLA-E	2.06885e-06	1.57197	1.30415	1.89479
SNAP91	1.52135e-15	0.486236	0.407275	0.580506
FABP5	2.18466e-19	1.90774	1.6575	2.19575
EN1	1.56517e-21	1.80492	1.59851	2.03797
LYN	1.07256e-06	1.51203	1.28059	1.7853
COL6A2	7.71718e-12	1.6281	1.41598	1.87199
ELK3	2.47759e-11	1.8093	1.52018	2.1534
CHI3L2	9.9994e-12	1.71748	1.46978	2.00692
TNFAIP6	5.15896e-26	2.02126	1.77352	2.3036
FGL2	1.83416e-09	1.66238	1.40854	1.96196
KIAA0040	2.33957e-14	1.68048	1.47071	1.92016
PCOLCE	9.03835e-14	1.69002	1.47221	1.94004
OAS2	5.68642e-14	1.67636	1.46505	1.91815
PLEKHA4	2.90377e-18	2.14309	1.80548	2.54384
SLC15A3	2.91437e-08	1.67604	1.39646	2.0116
LAMC1	2.60229e-14	1.79472	1.54396	2.0862
LRRC25	5.48975e-05	1.41811	1.19673	1.68045
C1orf54	2.21503e-06	1.51373	1.27493	1.79727
FAM13C	1.70008e-11	0.547501	0.459401	0.652496
NDRG2	2.22589e-12	0.591631	0.510981	0.685012
DTX3L	2.06573e-14	1.84152	1.57473	2.15351
COL1A2	2.17903e-09	1.57719	1.35853	1.83105
BST2	7.35498e-11	1.7847	1.49922	2.12455
MYO1F	5.3496e-07	1.53466	1.29805	1.81441
AQP5	2.92235e-20	1.93003	1.6783	2.2195
FXYD5	5.20432e-07	1.58788	1.32553	1.90215
UPP1	3.09146e-11	1.59796	1.39155	1.835
COL1A1	1.09205e-05	1.39539	1.20286	1.61874
RUNDC3A	2.75439e-11	0.567898	0.480779	0.670804
SHOX2	3.68987e-21	1.62831	1.47157	1.80174
C2	2.08813e-08	1.54992	1.32971	1.80659
PTGS1	8.35809e-08	1.61101	1.35319	1.91794
LAIR1	4.48045e-06	1.49096	1.25707	1.76838
LYZ	4.76167e-08	1.57315	1.33701	1.85099
COL8A1	6.52942e-23	1.82034	1.61589	2.05066
MS4A6A	2.77905e-05	1.45506	1.22097	1.73403
HLA-DRB5	1.05448e-05	1.48579	1.24583	1.77197
S100A6	6.28967e-10	1.70184	1.43787	2.01428
COL4A2	5.71355e-11	1.62594	1.40587	1.88045
LIF	2.84727e-09	1.41307	1.26071	1.58383
RIPPLY2	1.32227e-17	0.472391	0.397711	0.561094
ARAP3	1.56671e-24	2.03498	1.77583	2.33195
HAMP	0.000160281	1.30841	1.13795	1.5044
APOL6	9.72193e-10	1.62903	1.39312	1.90488
RNASE2	1.04504e-05	1.40996	1.2102	1.64269
PLCB1	5.39306e-12	0.552923	0.467211	0.654359
GALNT13	5.30698e-16	0.539565	0.464773	0.626394
OLFML3	7.36385e-08	1.66471	1.38272	2.00421
SWAP70	5.10888e-22	2.4424	2.03712	2.92831
LUM	0.000177764	1.33274	1.14689	1.5487
SLC11A1	4.92392e-12	1.66977	1.44371	1.93122
DSCAML1	8.26918e-15	0.512345	0.432751	0.606578
POSTN	1.5894e-19	1.81238	1.59312	2.06182
LGALS3BP	2.09915e-12	1.80125	1.52861	2.12251
OCIAD2	1.1039e-19	2.09947	1.78882	2.46406
CLEC7A	2.80003e-08	1.58243	1.34579	1.86068
MARVELD1	1.70309e-12	1.7289	1.48502	2.01283
ALOX5	6.67838e-07	1.52937	1.29347	1.80829
MYD88	7.10402e-14	2.05286	1.7005	2.47823
UNC93B1	1.56614e-10	1.78787	1.49639	2.13613
MMP14	7.57078e-13	1.82975	1.55114	2.15839
FMOD	2.49438e-15	1.62193	1.43885	1.82831
COL4A1	5.51476e-11	1.63025	1.40865	1.88672
GABBR1	4.92452e-17	0.481801	0.406228	0.571433
NPC2	1.06232e-05	1.52993	1.26615	1.84865
SAMD9	7.17789e-18	1.88009	1.62847	2.17059
SOCS3	2.68001e-09	1.58212	1.36022	1.84022
TMEM176B	2.98801e-08	1.71735	1.41841	2.07929
DIRAS3	2.32093e-20	2.24069	1.88848	2.6586
FBLN5	4.59184e-08	1.50307	1.29874	1.73953
ARPC1B	1.17334e-05	1.48813	1.24575	1.77766
IQGAP2	2.87768e-20	1.89932	1.65729	2.17671
CRTAC1	1.84347e-24	0.374816	0.310443	0.452536
VAMP8	9.50784e-05	1.41211	1.18743	1.67932
PARP14	9.21543e-13	1.72455	1.48499	2.00277
MAP1LC3C	9.10254e-21	1.62071	1.46463	1.79342
VASN	8.30978e-20	1.99177	1.71733	2.31008
GDAP1L1	4.16615e-15	0.499397	0.419907	0.593935
CD151	3.70518e-15	2.05177	1.7153	2.45423
DPY19L1	2.69052e-20	1.75332	1.55626	1.97533
COL3A1	4.59192e-06	1.42146	1.22296	1.65219
VIM	1.35206e-08	1.73738	1.43584	2.10225
ARPP21	3.75541e-15	0.509371	0.430533	0.602645
SPRY1	1.76426e-17	1.84116	1.59965	2.11913
TUBB6	1.89112e-11	1.63874	1.41871	1.89291
CADM2	8.16797e-11	0.583785	0.496298	0.686693
CTSS	4.68607e-06	1.51827	1.26974	1.81544
MXRA5	5.84403e-07	1.40961	1.232	1.61283
SPTBN2	6.07849e-09	0.596915	0.501623	0.710309
GMFG	9.0838e-05	1.41826	1.19058	1.68947
CYBA	7.12539e-05	1.42696	1.19734	1.7006
FERMT3	2.59575e-05	1.45879	1.22343	1.73944
SPOCD1	1.15045e-09	1.55334	1.34797	1.78999
VAMP5	1.33036e-09	1.74766	1.45911	2.09328
COL5A1	1.71822e-08	1.44078	1.26901	1.63579
FLRT1	4.27041e-15	0.501945	0.422557	0.596247
TEAD2	3.23002e-14	1.69986	1.48219	1.9495
JPH4	3.25963e-15	0.557807	0.482428	0.644964
PKIB	1.78832e-13	1.6685	1.45596	1.91206
PSMB8	2.48574e-07	1.60521	1.34105	1.92141
TCEA3	2.18031e-11	1.5357	1.35441	1.74124
ALOX5AP	8.2965e-10	1.74875	1.46297	2.09035
OAS1	3.62616e-16	1.73875	1.52218	1.98613
PLAT	1.34037e-19	1.71112	1.52334	1.92204
ELFN2	2.28419e-12	0.518842	0.431945	0.623222
ANXA5	1.46582e-20	2.23954	1.88941	2.65454
MEOX2	2.60984e-26	1.98083	1.74592	2.24735
PDLIM4	5.92945e-19	1.91162	1.65724	2.20506
ZYX	8.02296e-15	1.92039	1.62884	2.26412
RCOR2	5.72755e-15	0.494612	0.414512	0.590191
FUT9	1.547e-13	0.537554	0.455888	0.63385
PTPRC	8.33375e-07	1.5043	1.27878	1.76959
SLC2A10	5.53233e-19	2.1461	1.81394	2.53908
TNR	3.55714e-10	0.639596	0.556231	0.735455
EFEMP2	2.50956e-16	2.11049	1.76523	2.52329
TEF	9.64929e-15	0.532846	0.454364	0.624883
VAV3	1.27265e-27	2.0824	1.82488	2.37625
LGALS3	2.32551e-11	1.66193	1.43193	1.92887
CDH20	2.75448e-09	0.594018	0.500303	0.705288
GLUD1	3.01938e-17	0.484227	0.409223	0.572977
INA	4.11442e-13	0.495239	0.409572	0.598823
CD248	2.99784e-09	1.52959	1.32919	1.7602
LMO2	9.07449e-10	1.74705	1.46139	2.08854
TLR2	1.35342e-06	1.51157	1.27833	1.78736
REPS2	3.24945e-12	0.533276	0.44682	0.636461
ITGA3	2.71701e-12	1.72796	1.48233	2.01428
B3GNT7	1.58605e-07	1.31252	1.18563	1.453
FCER1G	1.43333e-05	1.51721	1.25678	1.8316
TRIM22	1.20204e-11	1.75527	1.49179	2.06528
RHOJ	1.18942e-13	1.7851	1.53168	2.08045
ARHGDIB	9.41685e-05	1.424	1.19252	1.70042
TMBIM1	9.20392e-17	2.15693	1.79946	2.5854
CPVL	4.65094e-08	1.65748	1.38272	1.98684
SMOC1	1.14174e-17	0.534542	0.463115	0.616986
IFI44	4.59011e-14	1.75517	1.51648	2.03143
NPNT	5.08243e-17	1.93163	1.6561	2.25299
APOL4	6.70192e-12	1.73468	1.48221	2.03015
PTGFRN	2.37631e-24	2.29614	1.95664	2.69454
TMSB10	3.32905e-11	1.76009	1.48923	2.0802
MVP	2.77152e-06	1.48396	1.25817	1.75027
SCG3	7.76772e-14	0.571791	0.49383	0.66206
CDHR1	3.16951e-17	0.417743	0.341096	0.511613
FKBP9	6.78525e-17	1.78368	1.55716	2.04317
CBLN1	8.12894e-13	0.47454	0.38694	0.581972
HOXA5	8.3609e-21	1.67169	1.50107	1.8617
KCNIP3	2.77392e-15	0.506338	0.42768	0.599462
CPQ	9.36277e-17	2.31417	1.89879	2.82042
SASH3	7.07249e-06	1.4917	1.25283	1.77611
SCRT1	2.05907e-10	0.514842	0.419544	0.631788
FLNC	5.9239e-14	1.69662	1.47797	1.94762
PSRC1	6.86247e-17	2.1761	1.81306	2.61184
ATP1A3	2.2711e-10	0.559855	0.467969	0.669783
AEBP1	4.24515e-11	1.85902	1.54618	2.23517
RBP1	9.00493e-15	1.70952	1.4928	1.95772
CASKIN1	2.43353e-07	0.621298	0.518596	0.744339
FAM133A	6.12091e-21	0.411726	0.342096	0.495528
LTF	3.05311e-11	1.54205	1.3571	1.75222
ABI3	3.00464e-07	1.55571	1.31372	1.84228
CSMD3	2.04218e-13	0.463162	0.37718	0.568745
LGALS1	3.54719e-10	1.75419	1.47168	2.09093
SOCS2	4.36903e-13	1.62374	1.42415	1.8513
ALDOC	1.33193e-15	0.545153	0.469785	0.632613
CD93	3.34129e-05	1.39518	1.19208	1.63288
SAA1	3.70531e-16	1.46736	1.33806	1.60916
GABRB3	1.16762e-11	0.530642	0.441872	0.637246
TMEFF2	8.42349e-14	0.541417	0.460846	0.636075
SERPINE1	4.05524e-12	1.70865	1.4686	1.98794
BRSK2	6.41644e-08	0.625152	0.527267	0.74121
DLGAP1	2.84368e-09	0.578135	0.482517	0.6927
KIF21B	4.21357e-13	0.515894	0.431359	0.616997
LRRN4CL	2.5344e-07	1.4694	1.26939	1.70093
CTHRC1	3.58296e-09	1.48011	1.29941	1.68594
OMG	4.61364e-10	0.638838	0.55486	0.735526
LAMB1	1.67385e-08	1.58915	1.35298	1.86655
INPP5D	7.72882e-07	1.55963	1.30759	1.86026
SOX8	7.88834e-13	0.580237	0.499945	0.673422
RARRES2	2.05247e-11	1.54599	1.36106	1.75605
FBXO17	3.08592e-21	2.16994	1.84816	2.54775
DEF6	0.000365781	1.37646	1.15464	1.64091
FAM110B	7.74187e-15	0.478824	0.397666	0.576544
PLA2G2A	5.94842e-07	1.33846	1.19373	1.50074
CCDC8	2.83772e-20	1.65457	1.4867	1.8414
TAP1	6.28029e-09	1.61495	1.37381	1.89841
CD163	5.69087e-05	1.37457	1.17731	1.60488
ITGB2	4.79504e-05	1.44897	1.21175	1.73264
KCNE4	6.21467e-08	1.56988	1.33334	1.84839
C21orf62	1.40455e-12	1.86771	1.57123	2.22013
UNC5A	1.59758e-10	0.516813	0.422168	0.632677
BCAT1	1.14328e-16	1.76115	1.54055	2.01334
ENHO	4.47097e-14	0.523204	0.442186	0.619067
IGFBP7	0.000413459	1.39325	1.15902	1.67482
ICAM1	0.000173267	1.31871	1.1414	1.52357
BTN3A2	3.96871e-05	1.42505	1.20354	1.68734
AHR	0.000497846	1.35193	1.14088	1.60202
EPHB1	2.77104e-12	0.534183	0.448046	0.636878
TNFAIP2	6.87321e-06	1.45686	1.23652	1.71645
ST14	2.11637e-06	1.44676	1.24194	1.68535
CAMSAP3	8.75794e-13	0.530729	0.446109	0.631399
SHD	9.15538e-16	0.51967	0.443005	0.609602
FAM222A	1.75778e-08	0.615372	0.519741	0.7286
MICALL2	9.88187e-13	1.84734	1.56062	2.18673
GNG12	1.57843e-16	2.35106	1.91896	2.88045
IL18	3.44087e-08	1.66629	1.38988	1.99767
SEC61G	1.00721e-13	1.57094	1.39471	1.76944
SLIT1	2.87192e-09	0.595878	0.502288	0.706907
MX1	1.67855e-17	1.72079	1.51867	1.94981
COL8A2	2.77929e-07	1.53501	1.30351	1.80763
MAPK8IP2	2.5863e-08	0.591973	0.492201	0.711971
DMRTA2	3.93891e-26	1.93107	1.70932	2.18159
TRIP6	1.11509e-13	2.01125	1.67254	2.41855
FILIP1L	0.000122722	1.30938	1.1411	1.50248
RASL10A	1.62117e-18	0.461607	0.38845	0.548541
RTN1	1.07683e-12	0.536303	0.45178	0.63664
SLITRK1	9.13767e-07	0.635297	0.530053	0.761438
FN1	5.1313e-07	1.43173	1.24458	1.64702
C9orf64	2.85663e-14	1.93271	1.63084	2.29045
PID1	7.85926e-13	0.547597	0.464412	0.645681
PSD	3.98939e-09	0.565961	0.468218	0.684108
GNG5	6.2667e-14	2.28129	1.83911	2.82979
ATP8A1	8.81295e-06	0.662726	0.552768	0.794556
PTPRT	1.35511e-10	0.555641	0.4644	0.664807
FGF12	5.31914e-10	0.579911	0.488279	0.68874
NOG	6.71452e-16	0.438362	0.358843	0.535501
SPI1	0.000180628	1.4098	1.17784	1.68743
FAIM2	4.39101e-12	0.553042	0.467672	0.653996
FUCA2	1.02103e-12	2.13124	1.73087	2.62422
ATCAY	1.23848e-10	0.599618	0.513115	0.700703
RTP5	1.17791e-07	0.596277	0.492447	0.722
SH3GL2	7.07392e-18	0.524823	0.453216	0.607745
BGN	7.56132e-12	1.71454	1.46933	2.00068
TMEM176A	1.56427e-08	1.69699	1.41275	2.03841
BMP2	1.84774e-17	0.45146	0.375844	0.542289
GPSM3	1.5487e-05	1.47686	1.23749	1.76254
SKAP2	5.18376e-15	1.82381	1.56888	2.12016
NUDT11	2.46111e-06	0.640403	0.53203	0.770852
TGFB2	2.54547e-15	1.79857	1.55515	2.08009
IL13RA2	1.32791e-11	1.61178	1.40362	1.85081
KCNIP2	5.42972e-11	0.517913	0.425467	0.630445
RAB33A	6.30313e-10	0.588403	0.497347	0.69613
SPINK8	2.91234e-06	1.39831	1.21502	1.60924
MAN1C1	1.09494e-09	1.64384	1.40102	1.92874
HCLS1	7.19825e-07	1.52879	1.29253	1.80822
CDK5R1	8.65168e-07	0.653028	0.551071	0.773848
NCF4	0.00804456	1.26864	1.06393	1.51273
KCNQ2	9.23311e-11	0.575635	0.487068	0.680307
TYROBP	0.000399301	1.39905	1.16172	1.68486
MAP2	1.77409e-07	0.651351	0.554535	0.76507
PDE2A	9.95193e-13	0.487043	0.399666	0.593523
FERMT1	4.28975e-13	0.540976	0.458148	0.638777
GBP3	3.52574e-07	1.60335	1.33698	1.92279
PLA2G5	1.09025e-20	2.22767	1.88258	2.63601
FXYD6	2.49452e-21	0.485626	0.418273	0.563826
SPHKAP	5.06036e-15	0.475826	0.395059	0.573106
BCL2A1	0.000226791	1.33113	1.14337	1.54971
GBP2	0.00117036	1.31934	1.11605	1.55965
IRF7	3.60593e-10	1.61245	1.38877	1.87217
PDGFA	7.09915e-17	1.8847	1.62405	2.18718
TNFRSF1B	0.000225637	1.37913	1.16258	1.63601
COL14A1	0.000220399	1.29757	1.13009	1.48986
MGP	3.76427e-05	1.39962	1.19282	1.64226
STX1B	1.17734e-07	0.593279	0.489059	0.719709
C1QB	3.97286e-05	1.45205	1.2154	1.73478
FLNA	4.92306e-12	1.74307	1.48883	2.04072
WWTR1	4.84473e-08	1.58542	1.34356	1.87081
STAT1	1.29469e-12	1.70218	1.46957	1.97161
RGS16	2.34792e-12	1.69269	1.46112	1.96095
OPHN1	2.77089e-08	0.611407	0.513979	0.727302
SLA	1.52619e-06	1.53674	1.28982	1.83092
C1QA	0.000318506	1.38199	1.15879	1.64819
CP	1.16996e-07	1.52172	1.30281	1.7774
IFITM3	2.85109e-14	1.96028	1.64809	2.33161
FPR3	6.95237e-05	1.40009	1.18616	1.65261
IFITM10	6.61653e-17	0.443703	0.366684	0.536898
TSTD1	5.47138e-17	1.96303	1.67642	2.29864
TEAD4	0.000348745	1.26365	1.11155	1.43657
MAST1	1.53825e-06	0.64712	0.541882	0.772796
S1PR3	3.1019e-07	1.50144	1.285	1.75434
FTL	1.57519e-05	1.4979	1.24689	1.79944
EHD2	5.73957e-13	1.87536	1.58057	2.22513
C3	7.17742e-05	1.46073	1.21152	1.76121
CAPN5	1.19223e-08	1.45644	1.27983	1.65742
CD4	0.00234629	1.31222	1.10151	1.56324
COLEC12	0.016355	1.22193	1.0375	1.43916
KLHDC8A	2.21654e-12	1.75235	1.49832	2.04946
HMOX1	0.00017093	1.41963	1.18255	1.70425
ACTL6B	1.61503e-08	0.586828	0.487744	0.706041
SCD	1.63973e-10	0.564476	0.473686	0.672668
PDZD4	3.37502e-09	0.602818	0.509701	0.712946
FAM155A	1.48225e-12	0.511882	0.425222	0.616204
CD300A	0.00127353	1.32865	1.11773	1.57938
AMER2	1.5294e-07	0.647064	0.54999	0.761271
IBSP	0.000543523	1.24438	1.09936	1.40853
CHGB	1.47696e-09	0.560497	0.464599	0.676189
LAT2	1.87048e-05	1.46947	1.23199	1.75272
SOD3	2.77092e-08	1.48143	1.28962	1.70176
NKAIN1	2.05702e-09	0.576984	0.482012	0.69067
PROS1	3.31139e-05	1.44382	1.21393	1.71724
SEMA6B	1.16428e-13	0.517173	0.434512	0.615559
TGFBI	0.0231388	1.22409	1.02809	1.45745
SMIM18	3.18469e-12	0.524234	0.437167	0.62864
NMNAT2	2.22701e-10	0.548957	0.456121	0.660689
WASF1	1.48533e-06	0.648044	0.543111	0.773251
HSPB1	2.78583e-18	2.19535	1.83968	2.61977
F3	8.53552e-14	2.05932	1.70341	2.48959
DUSP6	5.16377e-08	1.57924	1.33975	1.86155
BEX1	2.83762e-11	0.646779	0.568878	0.735347
CRISPLD1	7.23914e-11	1.77503	1.49363	2.10946
IL13RA1	6.8655e-08	1.69472	1.39914	2.05273
WNT7B	4.27167e-08	0.568832	0.464879	0.69603
C1QC	0.000214269	1.39718	1.17042	1.66787
CMTM5	1.33806e-09	0.621945	0.533428	0.725149
GRIA2	1.28602e-12	0.536463	0.451685	0.637155
ABCC8	2.41815e-09	0.530004	0.430241	0.652899
LGALS9	1.46332e-05	1.49342	1.2457	1.79039
ZNF488	7.08154e-07	0.644115	0.541329	0.766418
FAM181A	9.55053e-12	1.88144	1.56865	2.25659
GPNMB	7.01544e-08	1.56868	1.33181	1.84768
VSTM2B	4.79959e-09	0.597747	0.503145	0.710136
ASIC1	1.7221e-11	0.602998	0.520376	0.698738
LCP1	4.4308e-05	1.4446	1.21082	1.72352
LINGO1	6.46412e-10	0.600926	0.511281	0.706288
DOK6	5.35892e-06	0.629817	0.516093	0.768601
C1orf162	1.33505e-05	1.44749	1.22552	1.70967
EVI2B	4.34956e-07	1.57946	1.32285	1.88585
PRR36	7.16722e-07	0.645524	0.542937	0.767494
MFAP4	1.43259e-12	1.76162	1.50607	2.06053
S100A10	0.000213784	1.42747	1.18233	1.72345
SLC1A1	2.49575e-08	0.618924	0.522837	0.732671
C5AR1	3.77159e-05	1.4186	1.20126	1.67527
RPRM	3.45267e-11	0.54438	0.454759	0.651664
CD53	0.00011732	1.42859	1.19146	1.71291
CACNG2	1.16021e-09	0.52404	0.425581	0.645278
CUX2	4.28879e-09	0.51957	0.417582	0.646467
TMEM151B	2.84131e-08	0.577467	0.475692	0.701017
MMP2	2.6267e-06	1.45521	1.24439	1.70176
DCTD	4.49169e-11	2.1622	1.71888	2.71986
TNK2	4.37661e-15	0.452078	0.37073	0.551275
HCK	0.0251542	1.22229	1.02533	1.45707
ST8SIA3	8.91807e-07	0.618229	0.510329	0.748941
GRIA4	2.16185e-08	0.670526	0.58297	0.771232
CSDC2	3.34939e-15	0.515364	0.437002	0.607778
PLEK	0.000398571	1.37846	1.15409	1.64645
AMER3	3.84065e-08	0.572876	0.469692	0.698728
GABRA3	7.35028e-09	0.591054	0.494566	0.706368
PIPOX	9.27743e-12	1.75273	1.49158	2.0596
CXCR4	0.00148027	1.32357	1.11346	1.57333
ITGA7	2.56465e-14	1.95384	1.64458	2.32126
HCST	0.0022388	1.30743	1.10095	1.55264
RNASE6	7.55706e-06	1.50778	1.25971	1.80469
NRSN1	5.51136e-09	0.58985	0.493947	0.704373
HAVCR2	2.21066e-05	1.48555	1.23731	1.78359
PRLHR	8.12836e-10	0.49969	0.40046	0.623507
LAPTM5	0.000433594	1.39175	1.1577	1.67311
SEZ6L	2.07349e-07	0.623643	0.521836	0.745311
KCNJ9	8.27711e-07	0.639756	0.535641	0.764109
ECM2	1.47161e-08	1.61978	1.37084	1.91393
OAS3	6.74837e-13	1.69966	1.47068	1.96429
CD37	1.64632e-05	1.48792	1.24184	1.78277
RGR	2.43045e-13	0.41628	0.32924	0.526332
ATOH8	4.35364e-09	0.561909	0.463535	0.681159
HES6	5.3293e-07	0.669073	0.57181	0.782879
GADD45A	6.00343e-12	1.81352	1.53063	2.14869
VSTM2A	1.86841e-07	0.58659	0.479973	0.71689
CD44	1.75159e-07	1.68979	1.38788	2.05737
FOXJ1	8.22703e-09	1.54368	1.3318	1.78927
CPLX1	1.38663e-06	0.621924	0.512843	0.754206
UNC79	4.4843e-09	0.541263	0.440883	0.664498
TNFRSF19	2.6042e-10	1.83716	1.52138	2.21848
PCDH15	1.02621e-13	0.485319	0.401133	0.587175
TM4SF1	2.53121e-05	1.37643	1.18628	1.59706
SCIN	0.00388166	1.27208	1.08038	1.4978
HPSE2	1.48498e-09	0.536055	0.437951	0.656135
SPP1	2.23438e-10	1.83737	1.52257	2.21725
HSPA6	0.00196909	1.22014	1.07569	1.38399
FKBP10	4.27564e-13	2.04108	1.68288	2.47553
TNC	4.3864e-13	2.05233	1.68948	2.49311
S100A3	2.86475e-06	1.41877	1.22545	1.64259
CEBPD	3.43449e-06	1.51349	1.27058	1.80283
CRB2	9.32307e-10	1.7134	1.44202	2.03585
ELAVL2	4.07579e-06	0.627095	0.514188	0.764796
CCR1	0.00152958	1.32076	1.11198	1.56874
CNTN1	2.23153e-05	0.735484	0.638118	0.847706
TSPYL2	8.11008e-05	0.692926	0.577376	0.831601
DDIT4L	1.91515e-18	1.90452	1.64893	2.19972
MMP9	0.000223856	1.26753	1.11758	1.4376
DSCAM	4.12684e-07	0.627875	0.524357	0.75183
SERPINF1	1.857e-10	1.70336	1.44599	2.00653
S100A16	7.03486e-09	1.86759	1.51165	2.30734
TOX	7.1882e-12	0.587161	0.504231	0.68373
FGFRL1	1.54081e-11	1.61913	1.40754	1.86253
ARL4C	3.90984e-14	1.93126	1.62845	2.29038
MEGF11	3.60437e-08	0.57016	0.466863	0.696312
CELF5	8.50059e-08	0.612954	0.512439	0.733185
MS4A4A	0.0417121	1.20487	1.00702	1.4416
DLL3	1.70358e-12	0.550798	0.466719	0.650024
LTBP1	1.90183e-11	1.76217	1.49353	2.07913
CD14	0.0239381	1.227	1.02738	1.46541
HOXD9	9.06067e-11	1.50069	1.32735	1.69667
ELAVL4	5.45441e-05	0.690417	0.576722	0.826527
CYBB	0.0077135	1.27786	1.06697	1.53043
CCL2	0.00530156	1.27381	1.07453	1.51004
NGFR	3.10013e-06	1.37639	1.20348	1.57414
MOXD1	1.53773e-21	2.03629	1.75929	2.35689
TMEM100	3.26076e-12	0.585183	0.503288	0.680404
GABRG1	1.78239e-06	0.628967	0.519997	0.760773
IFI6	6.82621e-11	1.64137	1.41435	1.90483
MYT1	1.60458e-06	0.651288	0.546634	0.775979
BASP1	4.96204e-12	0.551513	0.465816	0.652975
PIFO	3.20714e-09	1.57551	1.3554	1.83137
ISG15	1.6796e-08	1.5285	1.31903	1.77123
RSAD2	2.36078e-10	1.51376	1.33155	1.7209
CHGA	2.31047e-05	0.669576	0.556075	0.806244
GPR183	1.50878e-05	1.45091	1.22583	1.71731
SYP	3.12144e-05	0.665376	0.549281	0.806009
UNC13A	0.000265831	0.72025	0.603784	0.859181
UCP2	4.66341e-05	1.45457	1.21452	1.74207
KCNJ11	4.10932e-08	0.584862	0.48287	0.708396
ATF3	0.000212024	1.33273	1.14482	1.55147
SSTR1	3.36249e-08	0.556265	0.451713	0.685015
FBLL1	3.70436e-10	0.568924	0.476911	0.678691
S100A9	0.00552771	1.2698	1.07265	1.5032
KCNK3	1.18823e-09	0.501548	0.401545	0.626458
SSTR2	5.53083e-13	0.468505	0.38126	0.575715
TSPO	0.00043594	1.43631	1.17388	1.75741
S100A8	0.00430483	1.26369	1.07612	1.48396
SLC8A2	1.1425e-05	0.627077	0.509094	0.772405
GRIK2	1.71021e-09	0.562255	0.466187	0.678119
MAOB	3.91978e-10	1.89011	1.5484	2.30724
BRINP1	1.95406e-09	0.594494	0.501637	0.704539
TREM2	0.00068122	1.40844	1.1559	1.71615
NEU4	8.60951e-09	0.599359	0.503487	0.713486
DLGAP3	0.000118197	0.674431	0.551885	0.824187
FPR1	0.0053379	1.27292	1.07416	1.50845
FBXL16	7.51551e-05	0.654885	0.531083	0.807546
TCTEX1D1	1.08829e-09	1.48113	1.3054	1.68052
UGT8	2.79259e-05	0.697249	0.589013	0.825374
CPLX2	0.000159594	0.702121	0.584363	0.843608
DLL1	2.50934e-06	0.652366	0.546076	0.779345
CNTNAP2	2.24806e-05	0.668309	0.554687	0.805206
APBB1IP	0.00218867	1.31839	1.10468	1.57343
LUZP2	1.74686e-14	0.533239	0.454069	0.626212
OLIG2	1.31537e-08	0.639777	0.548459	0.7463
CHRNB2	2.51627e-05	0.673041	0.559822	0.809158
HMX1	1.12646e-13	0.474179	0.389406	0.577406
CELF3	3.76581e-06	0.659091	0.552332	0.786484
GRIN1	8.39296e-05	0.678726	0.559525	0.823322
SEL1L3	1.49379e-14	1.73519	1.50775	1.99695
RAPGEF4	1.00666e-05	0.643233	0.528823	0.782394
GFRA1	7.93848e-09	0.545697	0.444217	0.67036
SVOP	5.25015e-06	0.636035	0.523495	0.772769
CNGA3	5.17805e-13	1.8052	1.53777	2.11912
HIP1R	3.20974e-05	0.693333	0.583402	0.82398
NECAB2	1.61619e-05	0.660465	0.546977	0.797499
CYP27A1	5.95763e-08	1.74723	1.42795	2.1379
MMD2	2.74982e-06	0.648111	0.540648	0.776934
KLRC2	8.18887e-12	0.534783	0.446924	0.639913
CNTN3	1.66762e-06	0.634598	0.526848	0.764384
SPRY4	6.70236e-11	1.74016	1.47349	2.0551
NAP1L2	7.24701e-08	0.617139	0.517712	0.735661
MMP24	5.92354e-05	0.684057	0.568339	0.823336
GALNT9	1.73197e-05	0.651576	0.53593	0.792176
FRRS1L	9.2766e-07	0.612895	0.504025	0.745279
STXBP1	0.000282117	0.683326	0.556374	0.839245
GABRD	1.91724e-08	0.562348	0.460054	0.687387
OLIG1	4.9115e-09	0.63421	0.544472	0.738738
GPR17	1.01414e-06	0.646431	0.5427	0.769989
FAM163B	4.13381e-06	0.625054	0.511739	0.763462
PIRT	1.29727e-07	1.54776	1.31606	1.82026
RAMP3	0.00820749	1.27588	1.06502	1.5285
VWA1	1.40335e-06	1.48975	1.26703	1.75162
OLR1	4.41095e-05	1.46496	1.21972	1.75952
TMEM179	7.96464e-09	0.579127	0.48104	0.697214
ITGB4	9.72948e-07	1.58622	1.31878	1.9079
HRH3	2.69395e-05	0.642916	0.523098	0.790178
ZFP36	0.000334861	1.35886	1.14921	1.60674
SCN3B	2.87159e-06	0.646194	0.538195	0.775864
RASGRF1	1.09704e-05	0.640513	0.525157	0.781207
NXPH1	1.4119e-09	0.59245	0.500092	0.701865
UBE2QL1	0.000401613	0.699031	0.573292	0.852347
SLC25A48	9.46943e-09	0.589913	0.49263	0.706406
SNX10	5.50082e-05	1.43088	1.20223	1.70302
AQP1	1.16479e-14	2.2053	1.80412	2.69569
ARHGDIG	1.94766e-08	0.559075	0.456402	0.684846
VIPR2	4.47062e-05	0.680025	0.565075	0.818358
EMP1	8.75268e-10	1.78912	1.48549	2.1548
CA10	3.36547e-07	0.629364	0.526799	0.751898
ETNPPL	5.92711e-07	0.661218	0.562122	0.777784
USH1C	1.60755e-08	0.57138	0.470542	0.693828
DCX	3.25858e-06	0.633997	0.523282	0.768137
FABP7	1.7329e-06	1.6078	1.32346	1.95323
LRRC55	0.00237242	1.30868	1.10024	1.55661
ASIC4	5.7244e-08	0.625008	0.527439	0.740626
ISLR	0.0287901	1.20689	1.01966	1.4285
PPP1R1A	2.745e-07	0.603377	0.497653	0.731562
GAD1	0.00172562	0.740013	0.612996	0.893348
LGR6	8.69194e-16	1.81948	1.57257	2.10516
SYN1	0.00536712	0.776513	0.649855	0.927858
IGFBP3	4.02997e-09	1.73172	1.4422	2.07935
GABRG2	0.000115229	0.690815	0.572417	0.833703
GPR27	6.00404e-12	0.523288	0.435122	0.629319
ACBD7	0.0249128	0.815022	0.681615	0.974539
IGFBP5	8.91316e-12	1.83449	1.54106	2.1838
MT1M	9.3706e-13	1.92083	1.6057	2.29781
CABP1	8.65364e-05	0.634735	0.505859	0.796444
SFRP2	1.51419e-14	0.475105	0.392983	0.574389
RAB3C	6.77793e-05	0.672808	0.55363	0.817641
OLFM1	0.000857366	0.725911	0.601299	0.876348
CPNE5	0.000725852	0.751882	0.637272	0.887105
HSPB6	1.97439e-11	1.76298	1.49382	2.08065
CDC20	4.85796e-15	1.81819	1.5655	2.11167
C3AR1	0.00743353	1.27844	1.06799	1.53035
TAGLN3	0.000641226	0.7334	0.613795	0.876311
PCSK2	0.0434169	0.822312	0.680119	0.994233
TUBB4A	0.00801508	0.77958	0.64852	0.937127
CALN1	6.73405e-11	0.497458	0.403357	0.613513
NKAIN4	3.82648e-07	0.633444	0.531085	0.755531
SAPCD2	9.34177e-05	0.693727	0.57746	0.833404
STOX1	0.00263577	0.74927	0.620778	0.904359
L1CAM	0.000397316	0.7152	0.594117	0.86096
BTBD17	3.41176e-09	0.561142	0.4633	0.679646
CALCRL	2.48259e-09	0.629498	0.540657	0.732937
GAP43	0.00538723	1.29528	1.07951	1.55418
SNX22	5.54785e-05	0.695916	0.583458	0.83005
IQSEC3	0.00252055	0.746221	0.617139	0.902303
MDK	0.000262751	1.37613	1.15929	1.63354
EFEMP1	0.0120816	1.26045	1.05201	1.51018
HPCAL4	0.000386961	0.718444	0.598523	0.862393
CHRM1	0.00588777	0.766149	0.633841	0.926075
JUNB	0.00930439	1.2356	1.0535	1.44917
RAB3A	0.00616919	0.760174	0.624722	0.924996
BCAN	4.9005e-06	0.687501	0.585422	0.807381
HAPLN1	6.23287e-05	0.683039	0.566764	0.823168
CDK5R2	0.000229248	0.704351	0.584546	0.848711
CAV1	0.000158592	1.3592	1.15911	1.59383
SNCB	0.00123598	0.73746	0.613046	0.887123
CELF4	0.00790702	0.77248	0.638492	0.934586
HES5	0.00128944	0.727961	0.599972	0.883252
CBR1	3.63297e-07	1.67494	1.37309	2.04314
SYT4	0.00617153	0.774805	0.645486	0.930031
ARC	4.20835e-09	1.67001	1.40743	1.98157
RGS1	0.003096	1.31302	1.09624	1.57267
SNAP25	0.00614552	0.773834	0.64416	0.929613
TPPP3	3.23885e-07	1.58838	1.33003	1.89691
GABBR2	5.80451e-06	0.65743	0.548401	0.788134
EMILIN3	1.84373e-21	2.0017	1.73502	2.30937
DAAM2	0.00026126	0.731985	0.619102	0.86545
CD24	5.85057e-07	0.66264	0.563852	0.778736
APLNR	0.0258542	1.2258	1.02483	1.46619
PDGFRA	0.0142964	0.795221	0.662019	0.955223
TRIM67	0.000107867	0.660814	0.535809	0.814984
CAMKV	0.0098406	0.77217	0.634537	0.939656
SNCG	0.000407486	0.701505	0.576326	0.853874
EGR1	0.00276526	1.29253	1.09259	1.52907
NPPA	0.00024666	0.690097	0.565951	0.841475
SYT13	0.00400807	0.759011	0.629045	0.915829
CXCL14	0.00373512	1.31238	1.0921	1.5771
FOS	0.0256295	1.21087	1.02358	1.43242
STMN2	0.016209	0.802739	0.67109	0.960215
TMEM130	0.0321406	0.815282	0.676361	0.982738
SELL	1.04766e-05	0.655298	0.543005	0.790813
